# Supplementary material for: Cerium oxide nanoparticle-catalyzed three-component protocol for the synthesis of highly substituted novel quinoxalin-2-amine derivatives and 3,4-dihydroquinoxalin-2-amines in water
Source: Royal Society of Chemistry journal article supplement (doi:10.1039/c4ra00717d), 2014-01-01

# **Cerium Oxide Nanoparticle-Catalyzed Three-Component Protocol for the Synthesis of Highly Substituted Novel Quinoxalin-2-amine Derivatives and 3,4-Dihydroquinoxalin-2-amines in Water**

Naushad Edayadulla, and Yong Rok Lee\*

*School of Chemical Engineering, Yeungnam University, Gyeongsan 712-749, Republic of Korea*

*E-mail: [yrlee@yu.ac.kr](mailto:yrlee@yu.ac.kr)*

## **SUPPORTING INFORMATION**

### **TABLE OF CONTENTS**

|             |                                                                                      |                |
|-------------|--------------------------------------------------------------------------------------|----------------|
| <b>I.</b>   | <b>Catalyst details</b>                                                              | <b>S2</b>      |
| <b>II.</b>  | <b><sup>1</sup>H NMR and <sup>13</sup>C NMR spectra of compounds (5a-5q)</b>         | <b>S3-S18</b>  |
| <b>III.</b> | <b><sup>1</sup>H NMR and <sup>13</sup>C NMR spectra of compounds (7a-7i)</b>         | <b>S19-S27</b> |
| <b>IV.</b>  | <b><sup>1</sup>H NMR and <sup>13</sup>C NMR spectra of compounds (14a &amp; 14b)</b> | <b>S28-S29</b> |

## **I. Catalyst details**

**CeO<sub>2</sub>-NPs purchased from Sigma –Aldrich, South Korea**

**Cerium(IV) oxide - Catlog No.544841.**

**Nanopowder, <25 nm particle size (BET).**

## II. $^1\text{H}$ NMR and $^{13}\text{C}$ NMR spectra of compounds (5a-5q)

$^1\text{H}$  NMR of Compound **5a**

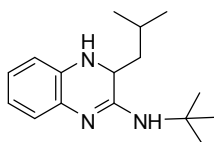

300 MHz,  $\text{CDCl}_3$

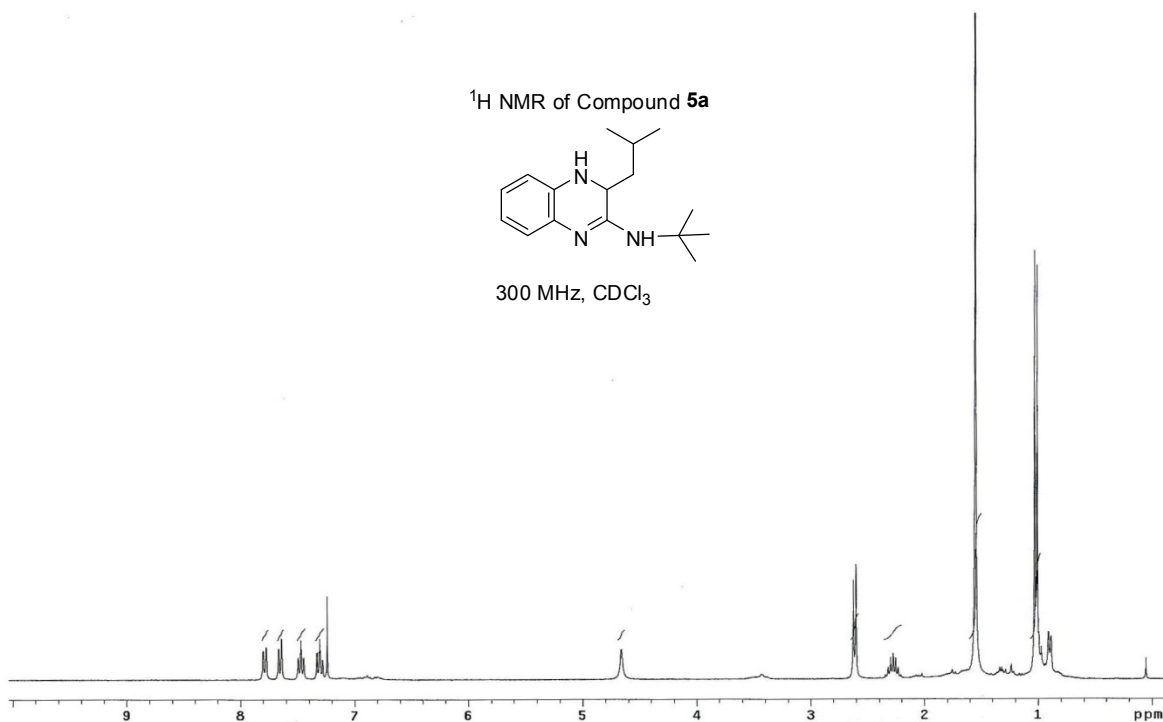

$^{13}\text{C}$  NMR of Compound **5a**

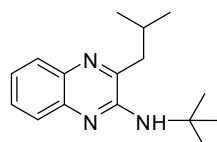

75 MHz,  $\text{CDCl}_3$

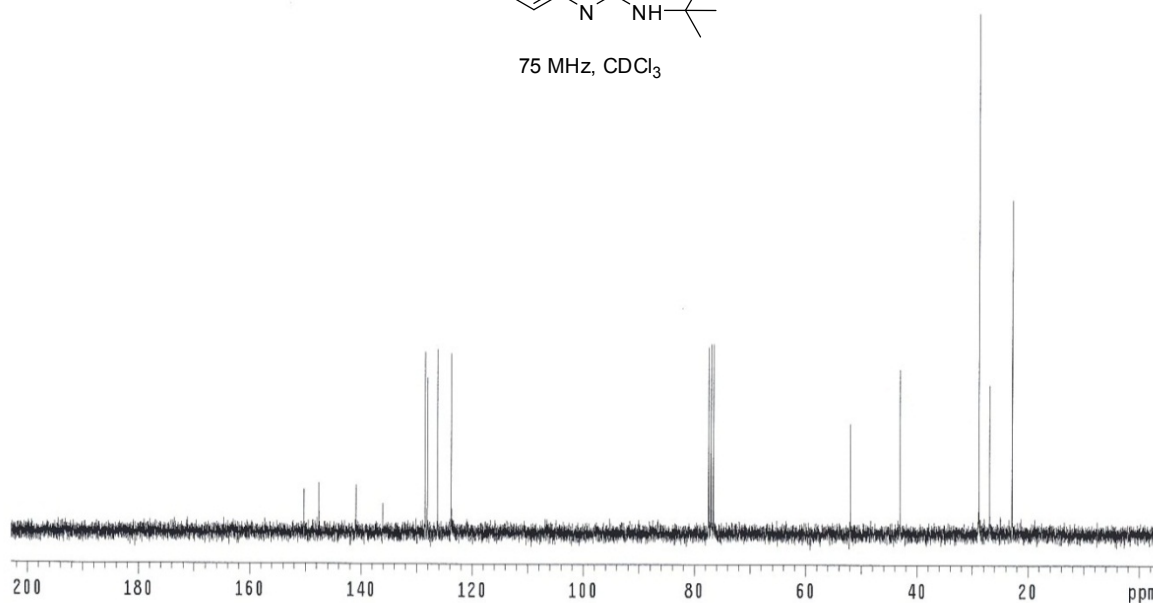

<sup>1</sup>H NMR of Compound **5b**

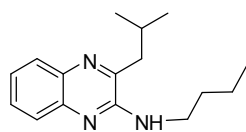

300 MHz, CDCl<sub>3</sub>

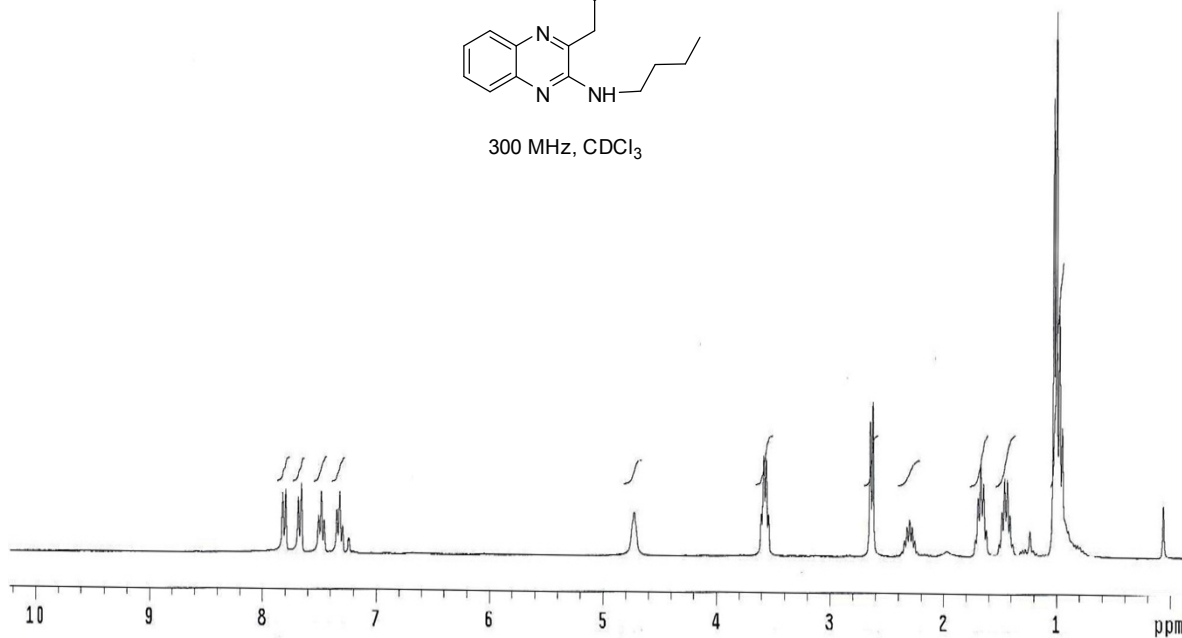

<sup>13</sup>C NMR of Compound **5b**

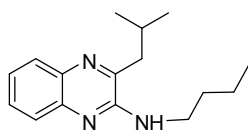

75 MHz, CDCl<sub>3</sub>

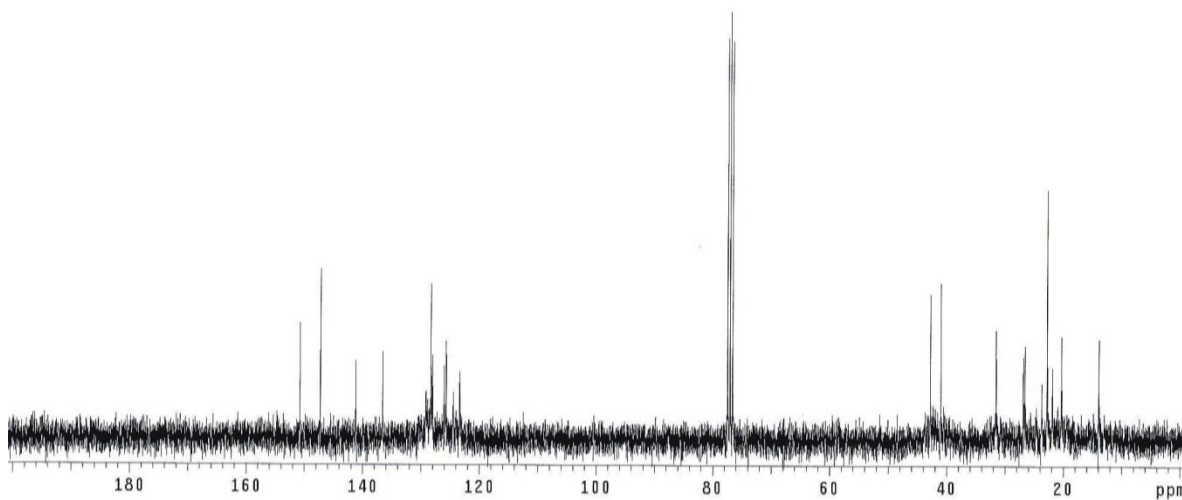

<sup>1</sup>H NMR of Compound **5c**

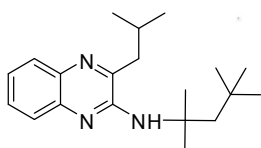

300 MHz, CDCl<sub>3</sub>

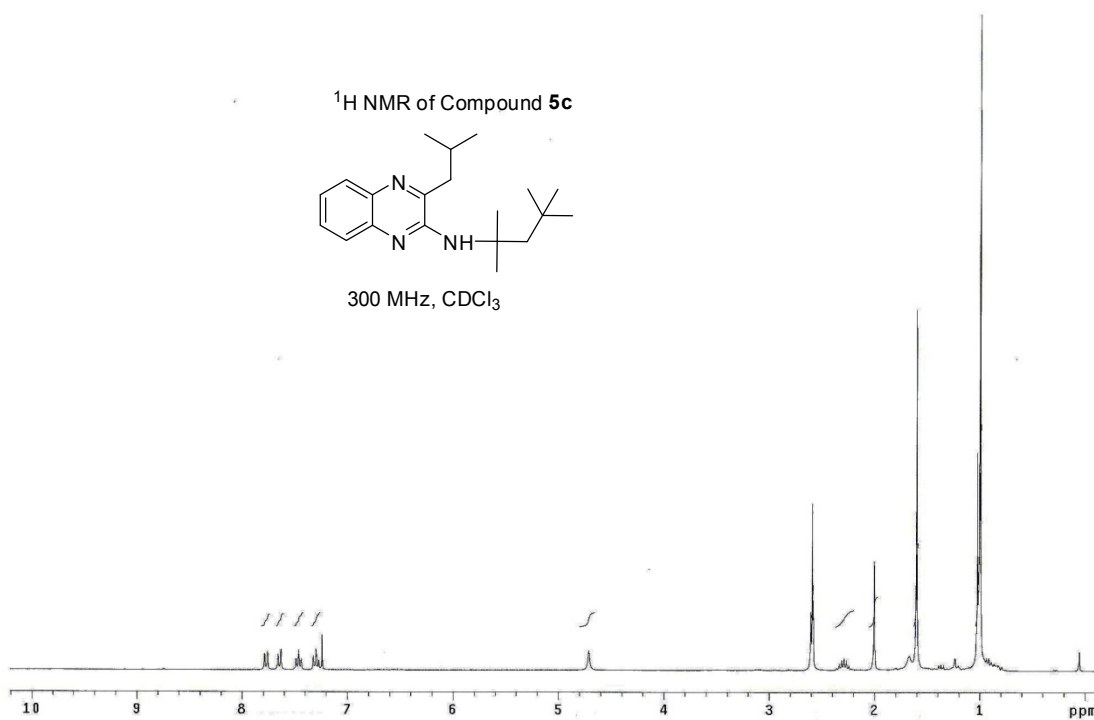

<sup>13</sup>C NMR of Compound **5c**

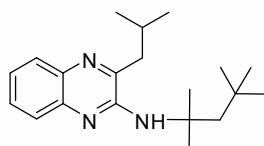

75 MHz, CDCl<sub>3</sub>

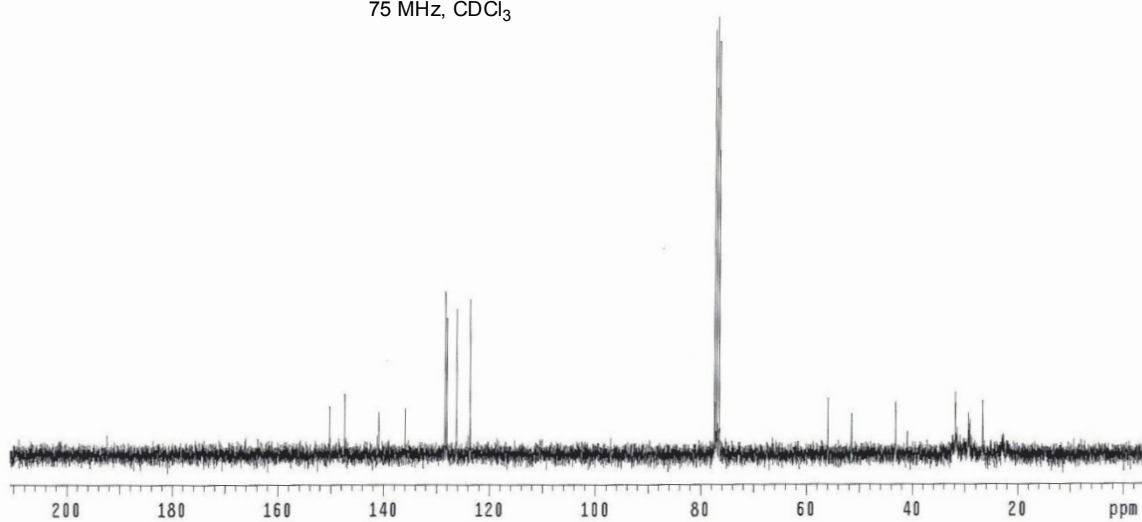

<sup>1</sup>H NMR of Compound **5d**

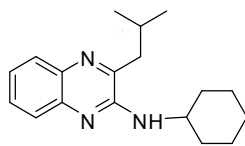

300 MHz, CDCl<sub>3</sub>

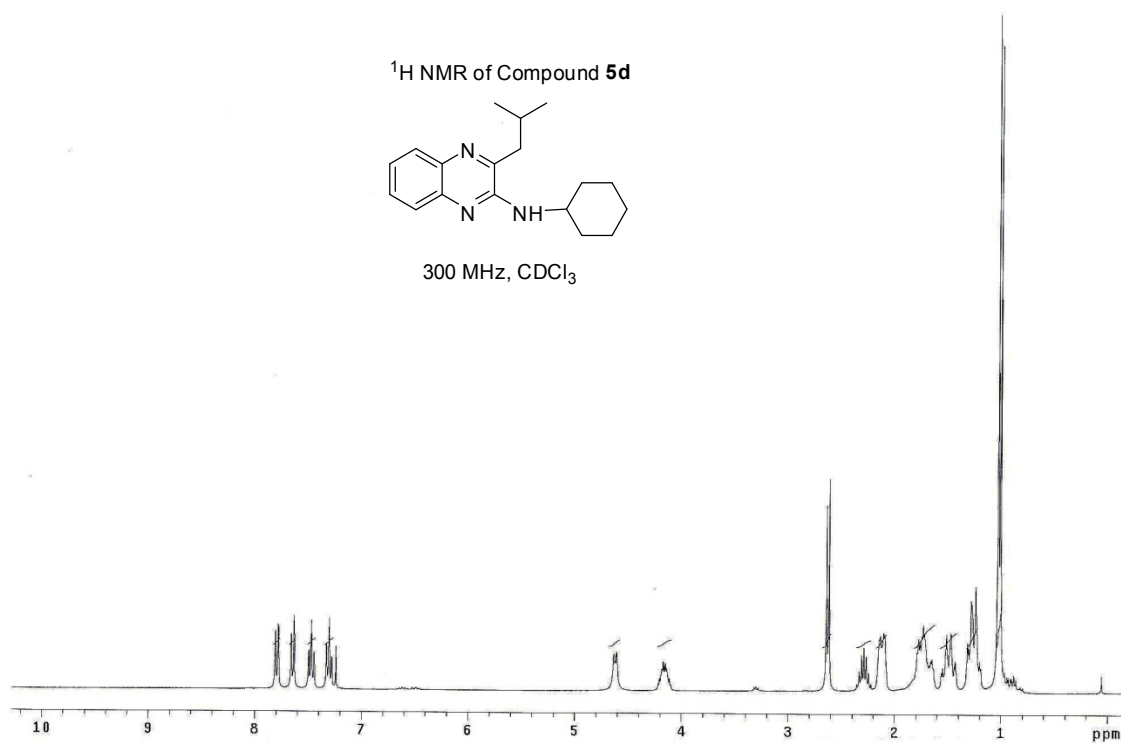

<sup>13</sup>C NMR of Compound **5d**

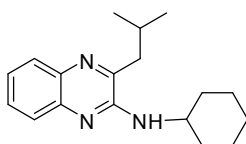

75 MHz, CDCl<sub>3</sub>

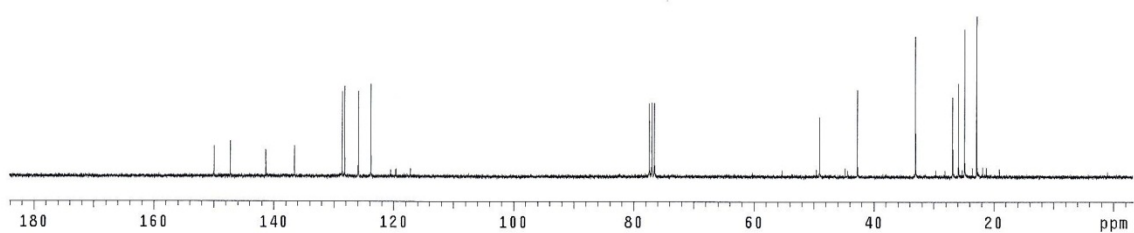

<sup>1</sup>H NMR of Compound **5e**

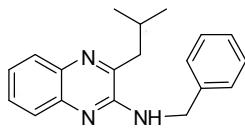

300 MHz, CDCl<sub>3</sub>

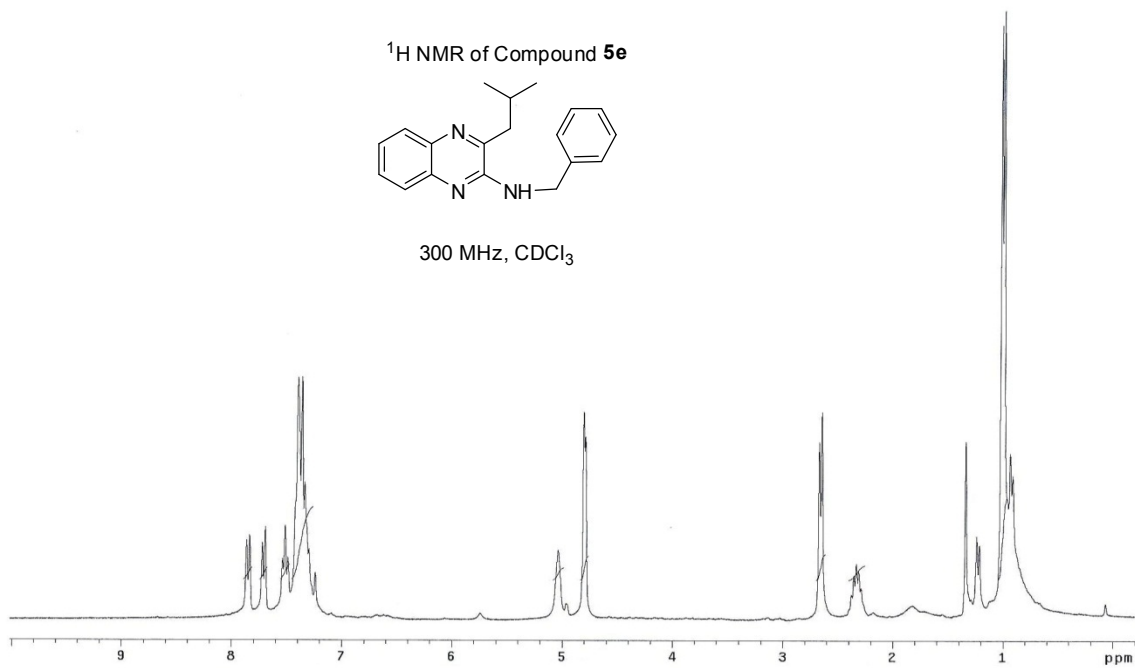

<sup>13</sup>C NMR of Compound **5e**

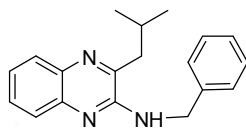

75 MHz, CDCl<sub>3</sub>

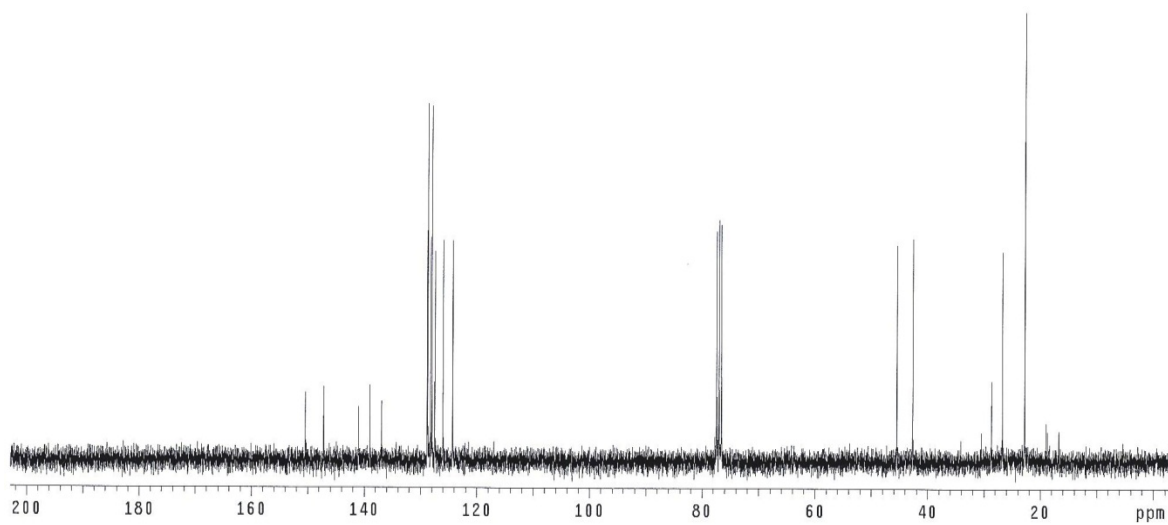

<sup>1</sup>H NMR of Compound **5f**

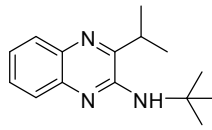

300 MHz, CDCl<sub>3</sub>

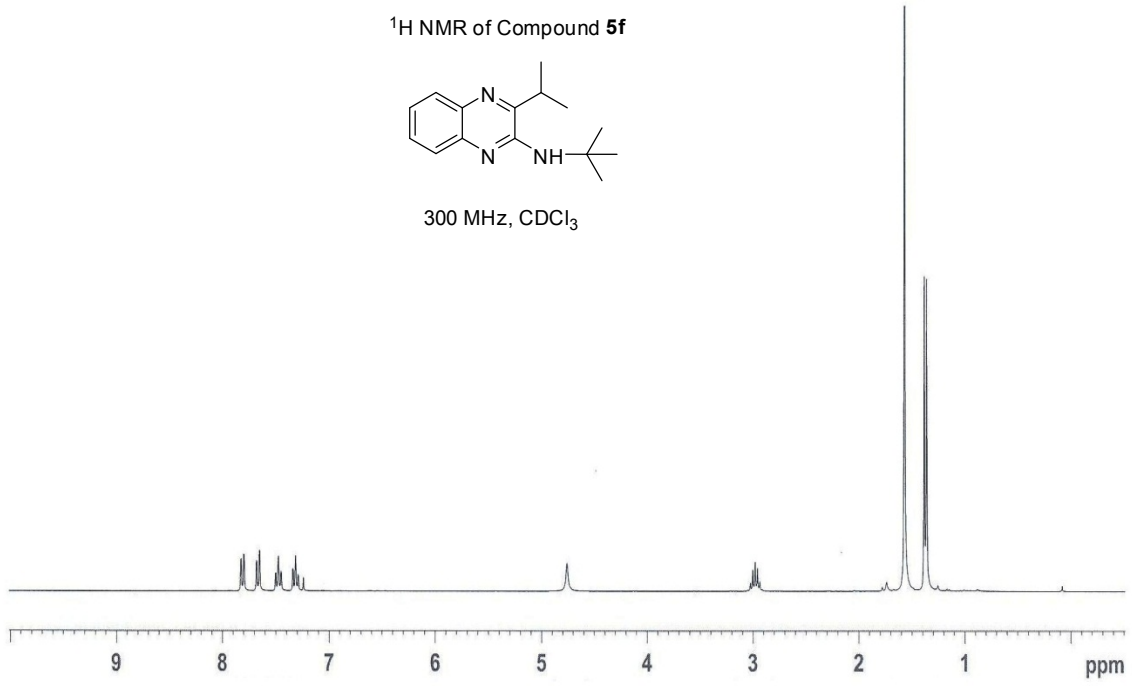

<sup>13</sup>C NMR of Compound **5f**

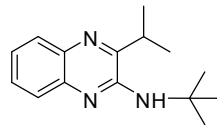

75 MHz, CDCl<sub>3</sub>

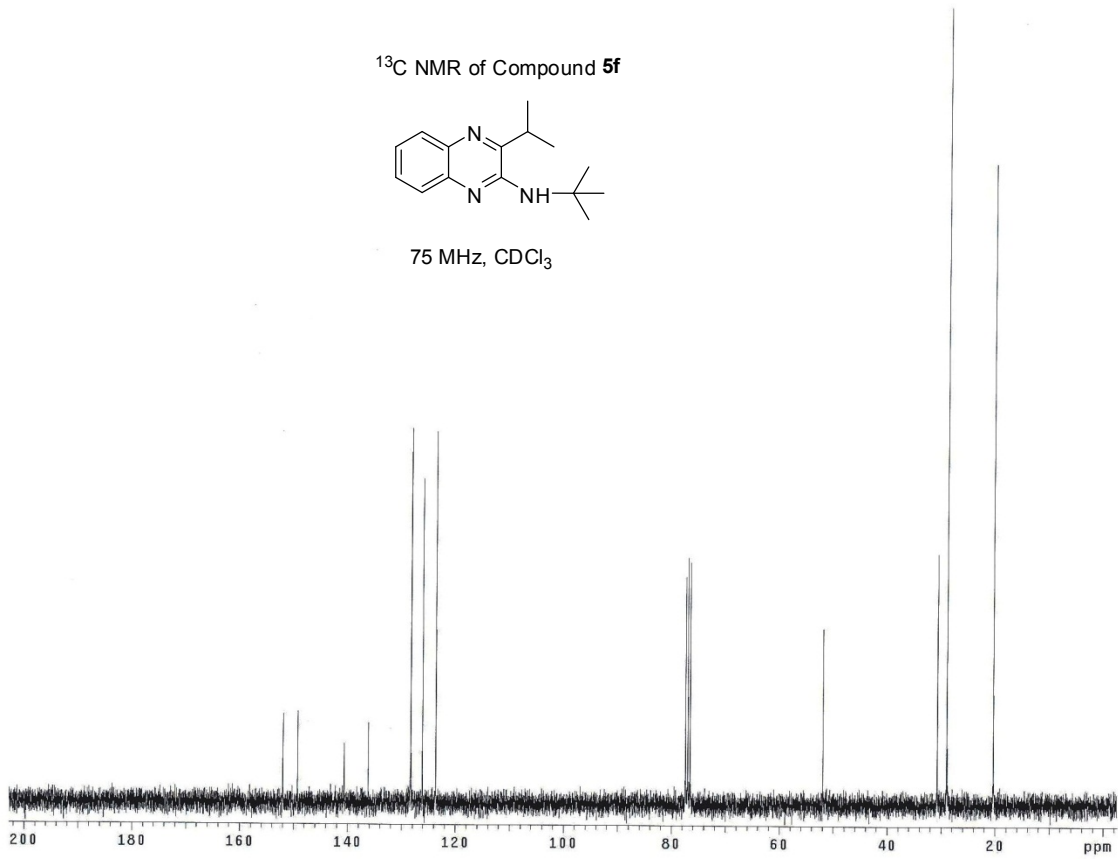



<sup>1</sup>H NMR of Compound **5g**

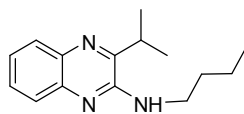

300 MHz, CDCl<sub>3</sub>

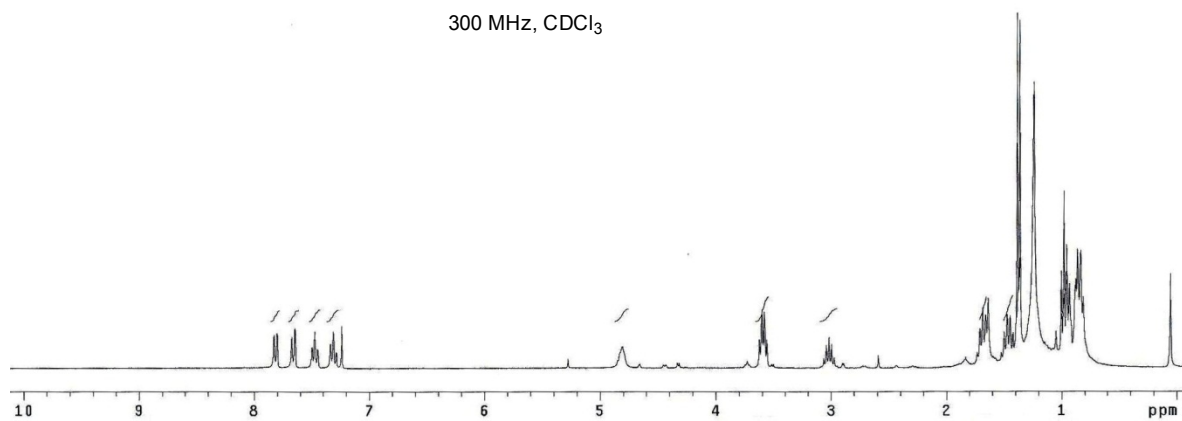

<sup>13</sup>C NMR of Compound **5g**

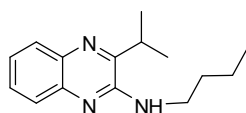

75 MHz, CDCl<sub>3</sub>

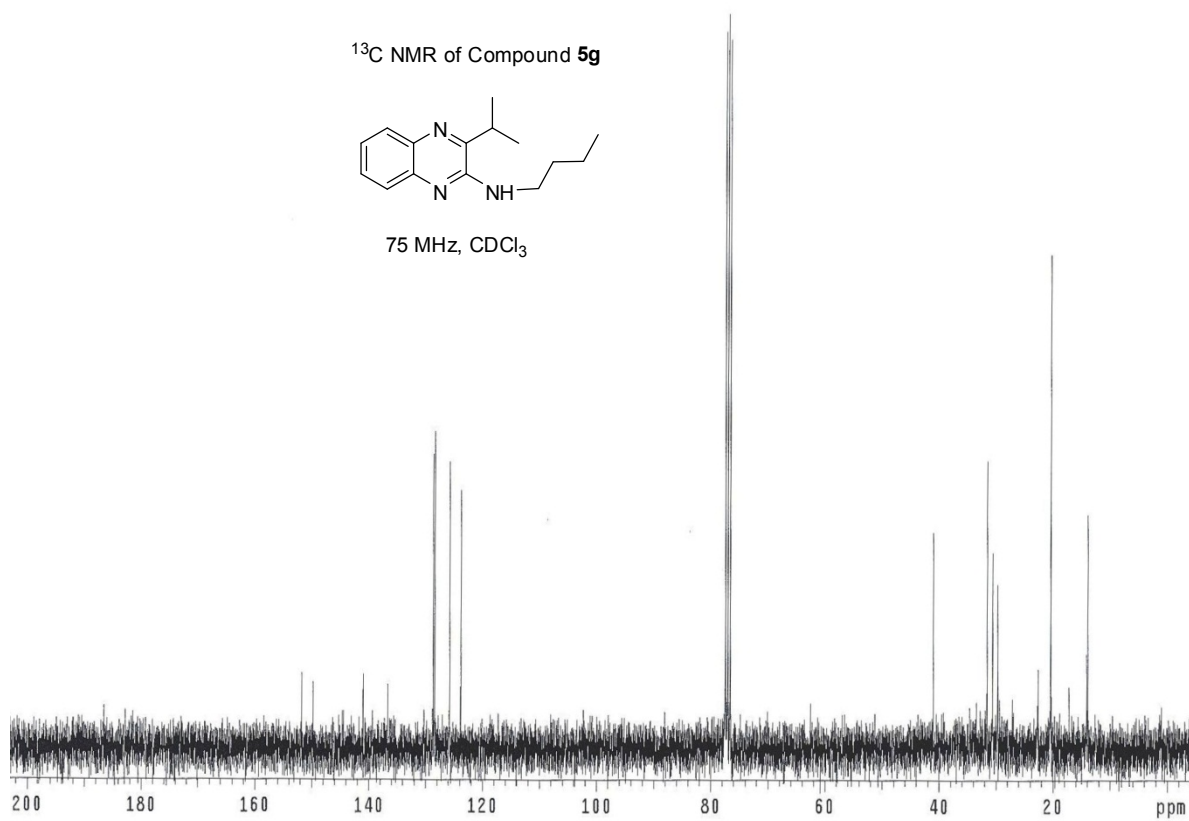

<sup>1</sup>H NMR of Compound **5h**

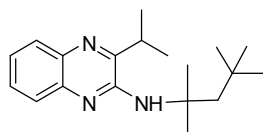

300 MHz, CDCl<sub>3</sub>

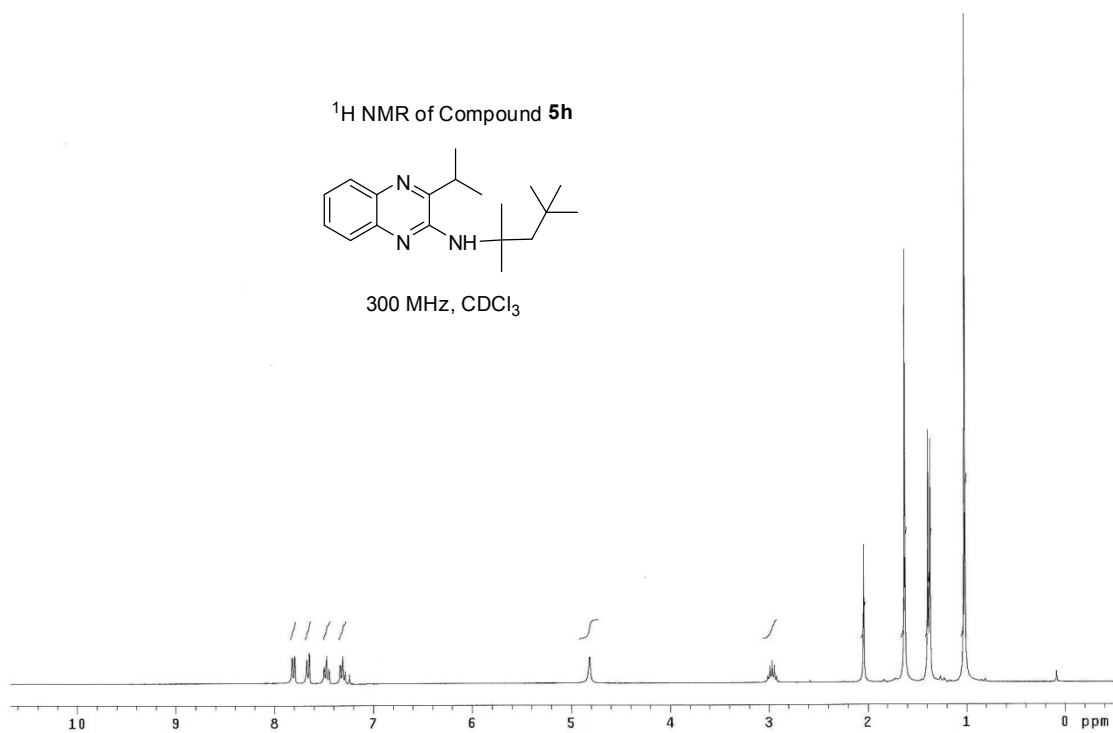

<sup>13</sup>C NMR of Compound **5h**

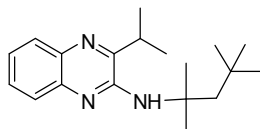

75 MHz, CDCl<sub>3</sub>

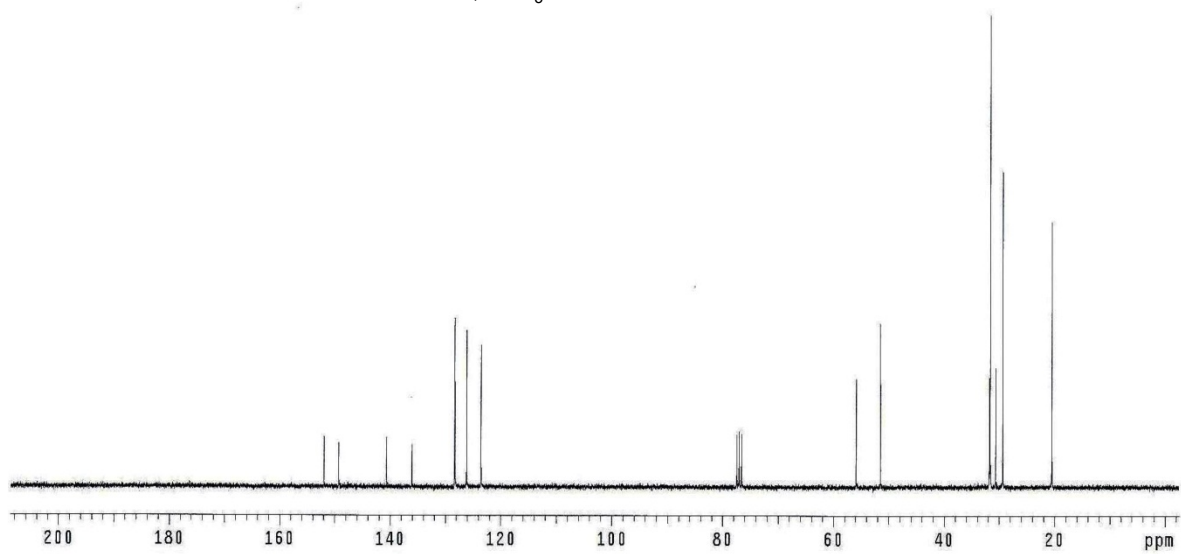

<sup>1</sup>H NMR of Compound **5i**

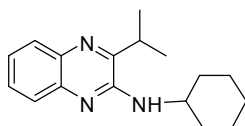

300 MHz, CDCl<sub>3</sub>

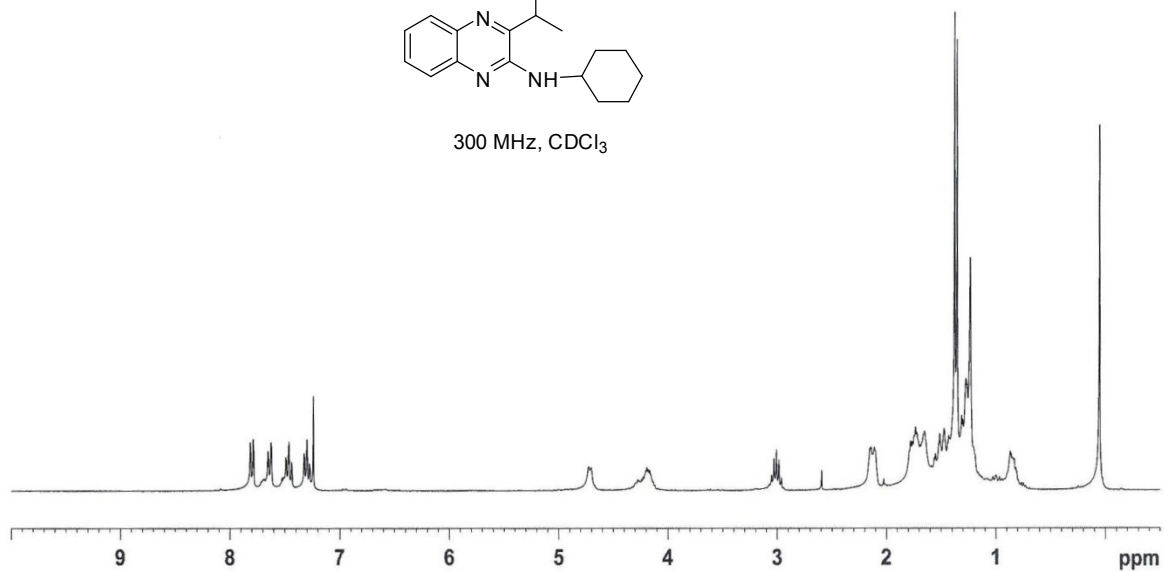

<sup>13</sup>C NMR of Compound **5i**

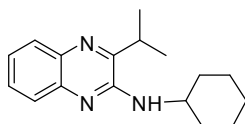

75 MHz, CDCl<sub>3</sub>

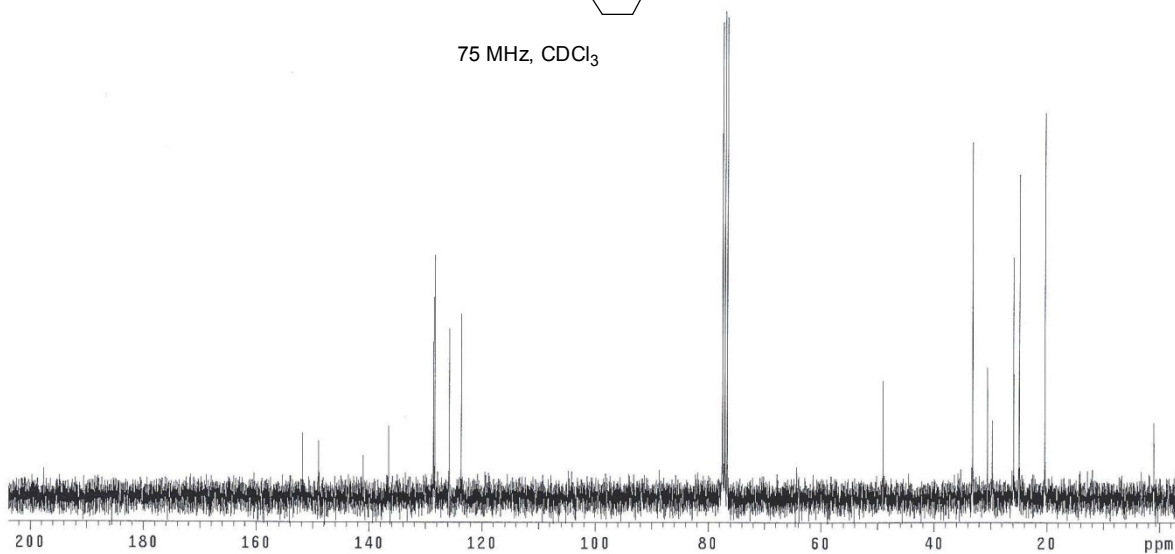

<sup>1</sup>H NMR of Compound **5j**

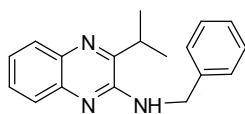

300 MHz, CDCl<sub>3</sub>

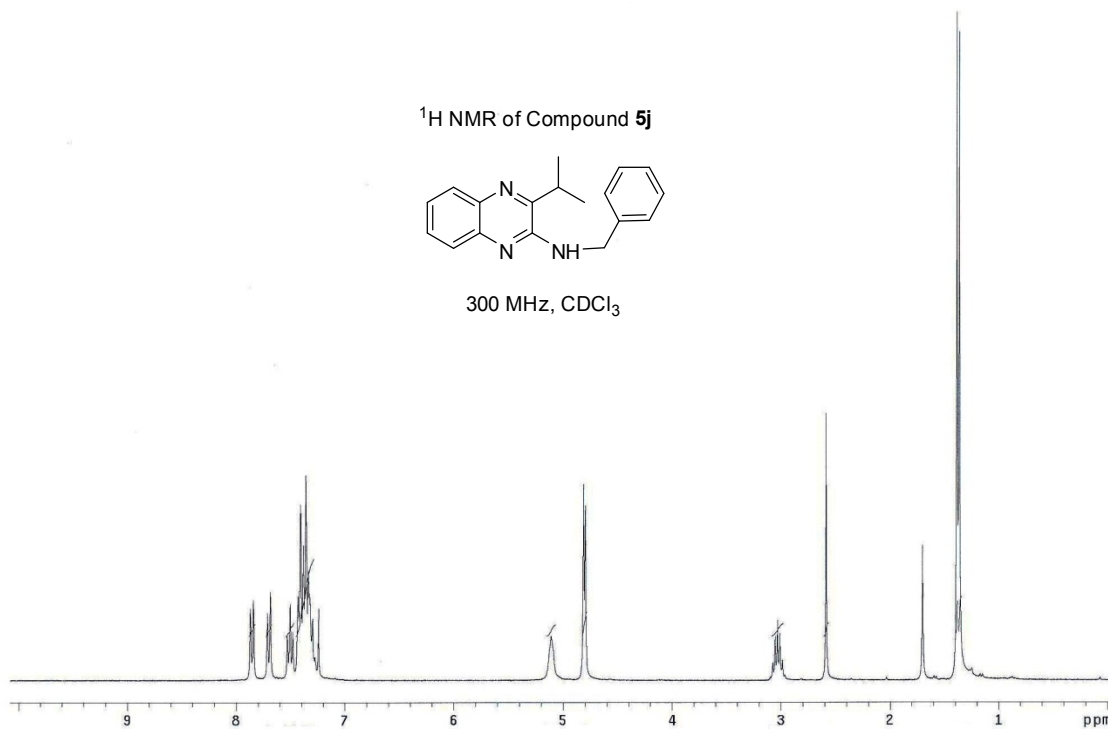

<sup>13</sup>C NMR of Compound **5j**

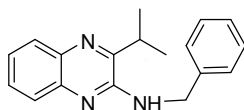

75 MHz, CDCl<sub>3</sub>

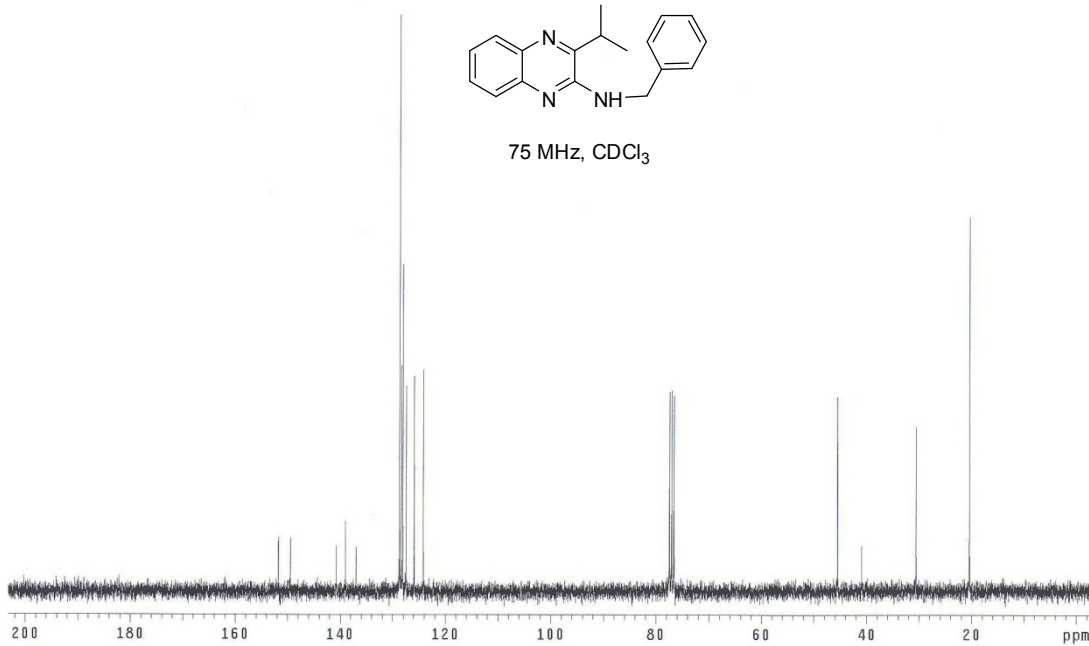

<sup>1</sup>H NMR of Compound **5k**

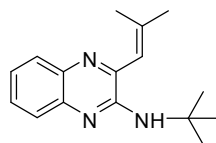

300 MHz, CDCl<sub>3</sub>

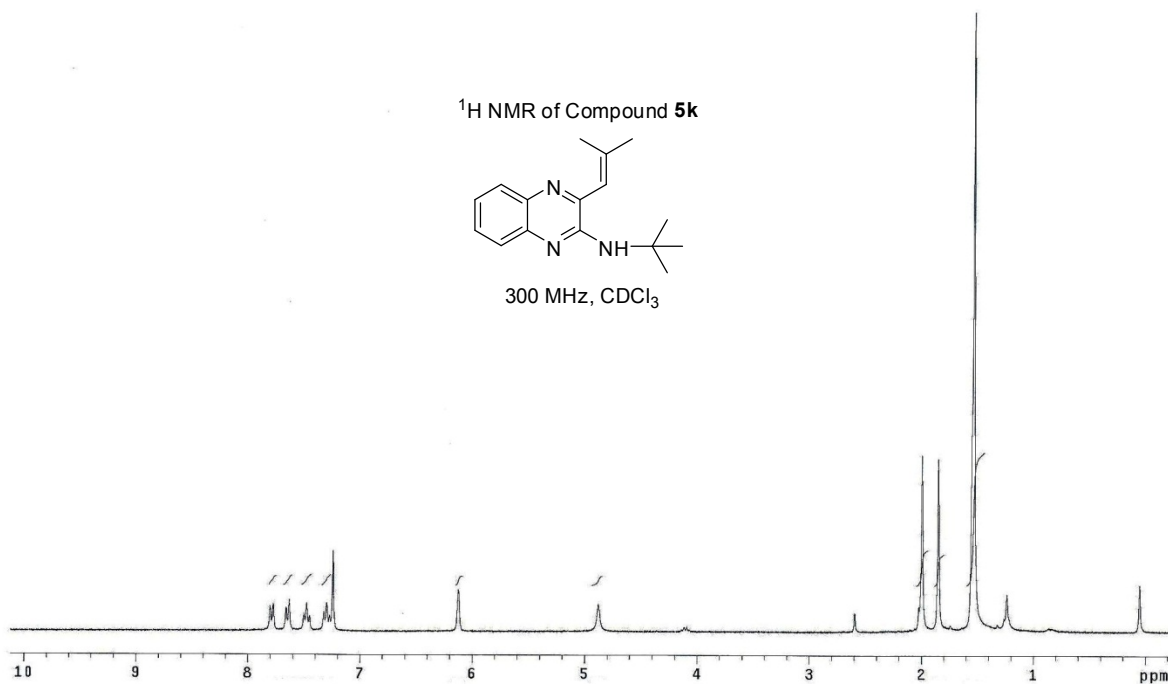

<sup>13</sup>C NMR of Compound **5k**

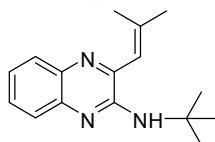

75 MHz, CDCl<sub>3</sub>

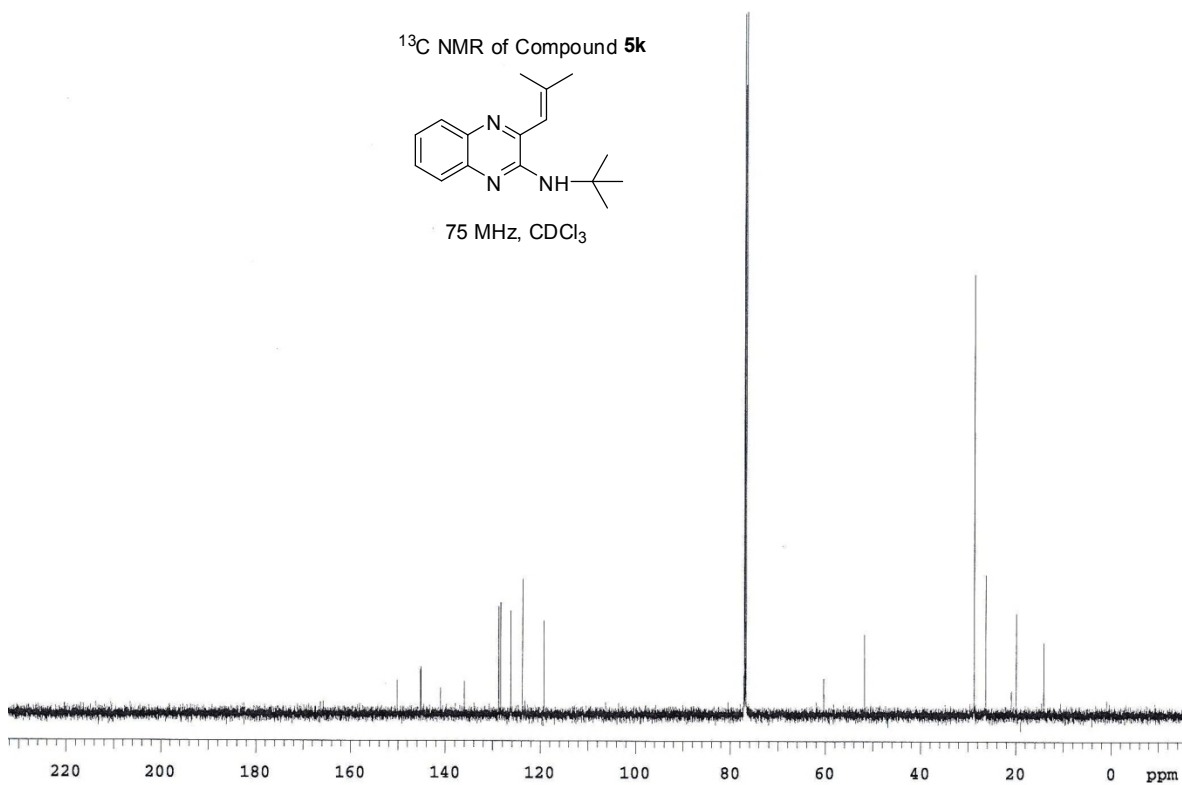

<sup>1</sup>H NMR of Compound **5I**

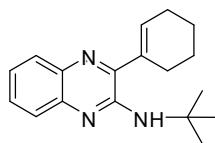

300 MHz, CDCl<sub>3</sub>

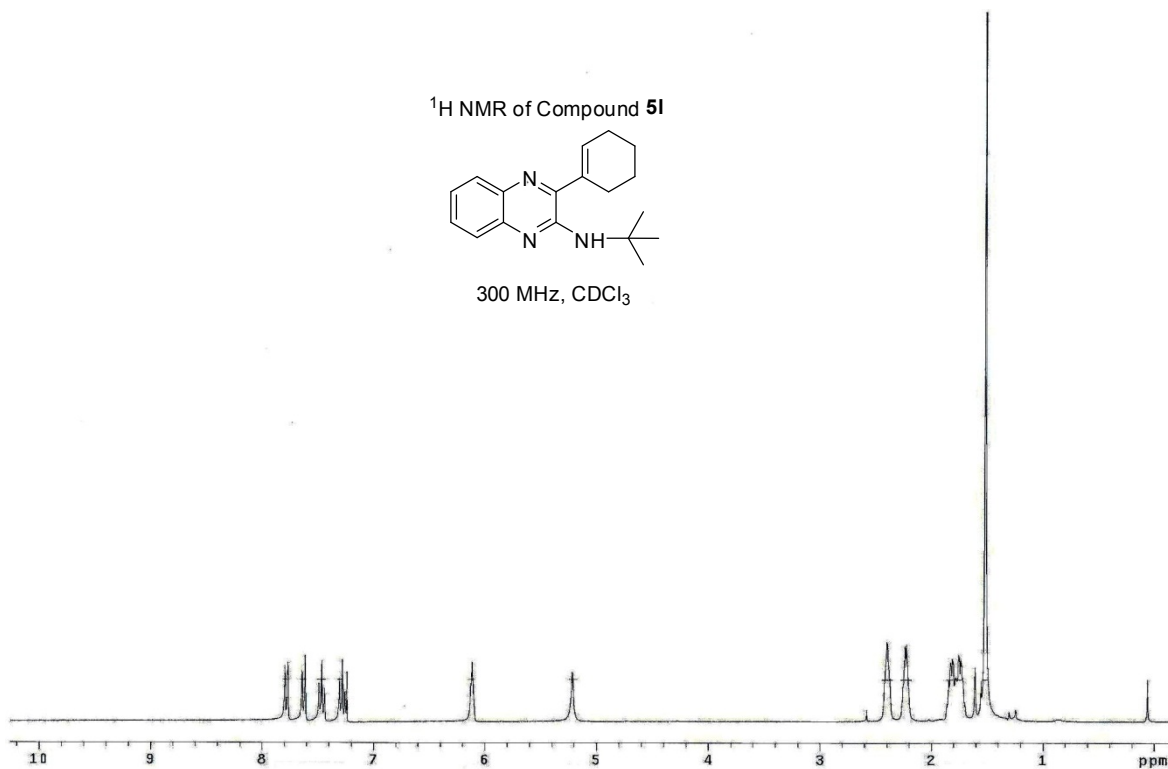

<sup>13</sup>C NMR of Compound **5I**

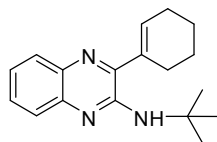

75 MHz, CDCl<sub>3</sub>

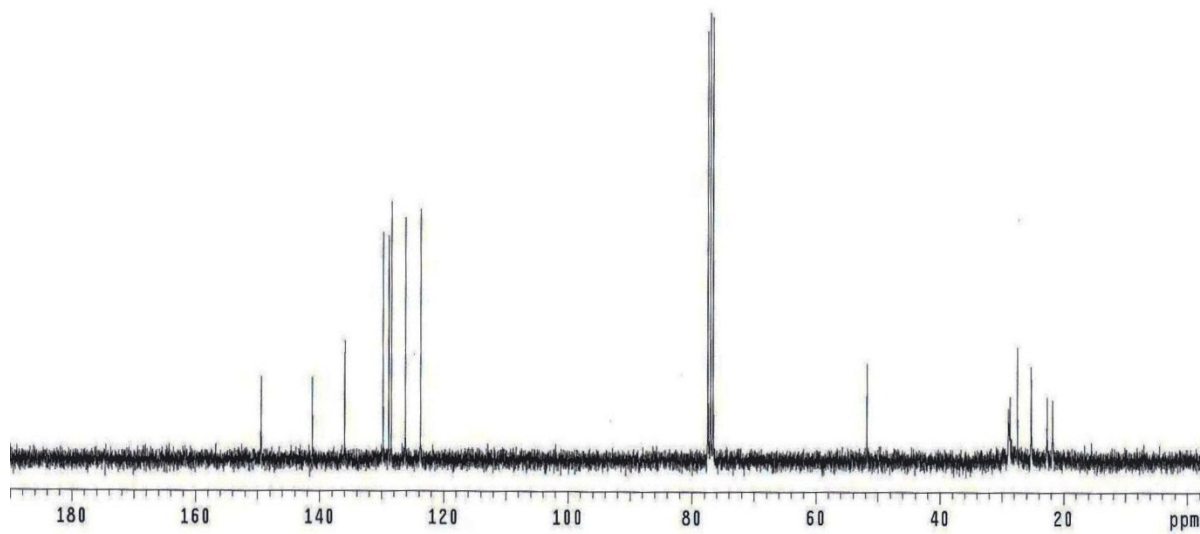

<sup>1</sup>H NMR of Compound **5n**

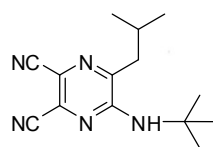

300 MHz, CDCl<sub>3</sub>

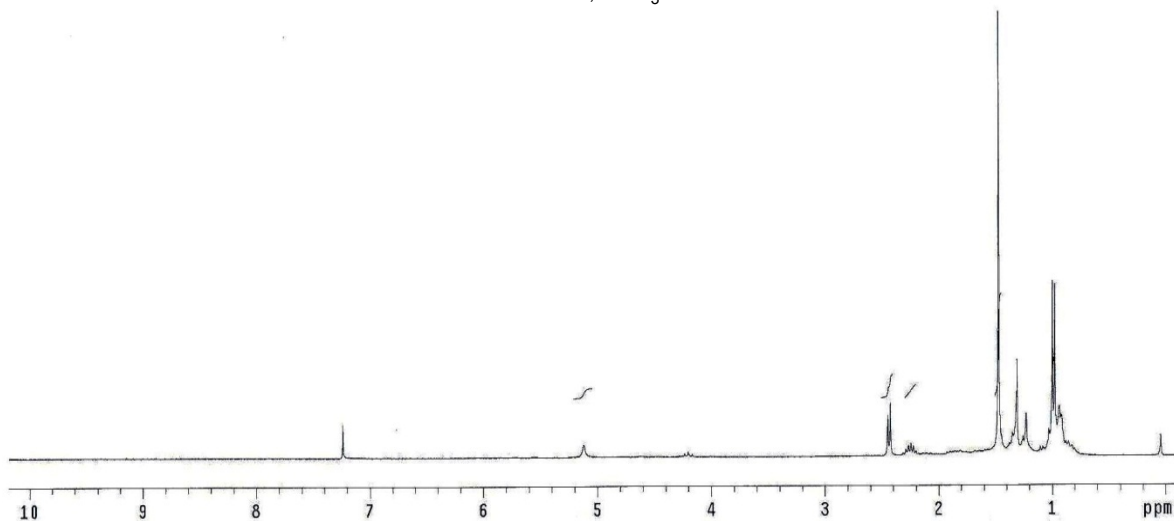

<sup>13</sup>C NMR of Compound **5n**

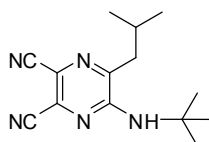

75 MHz, CDCl<sub>3</sub>

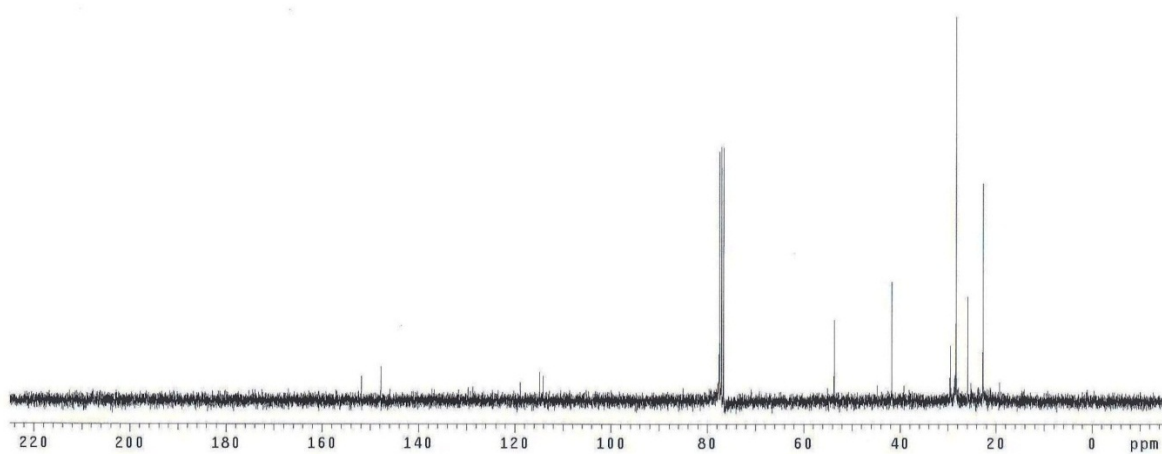

<sup>1</sup>H NMR of Compound **5o**

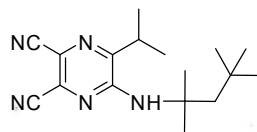

300 MHz, CDCl<sub>3</sub>

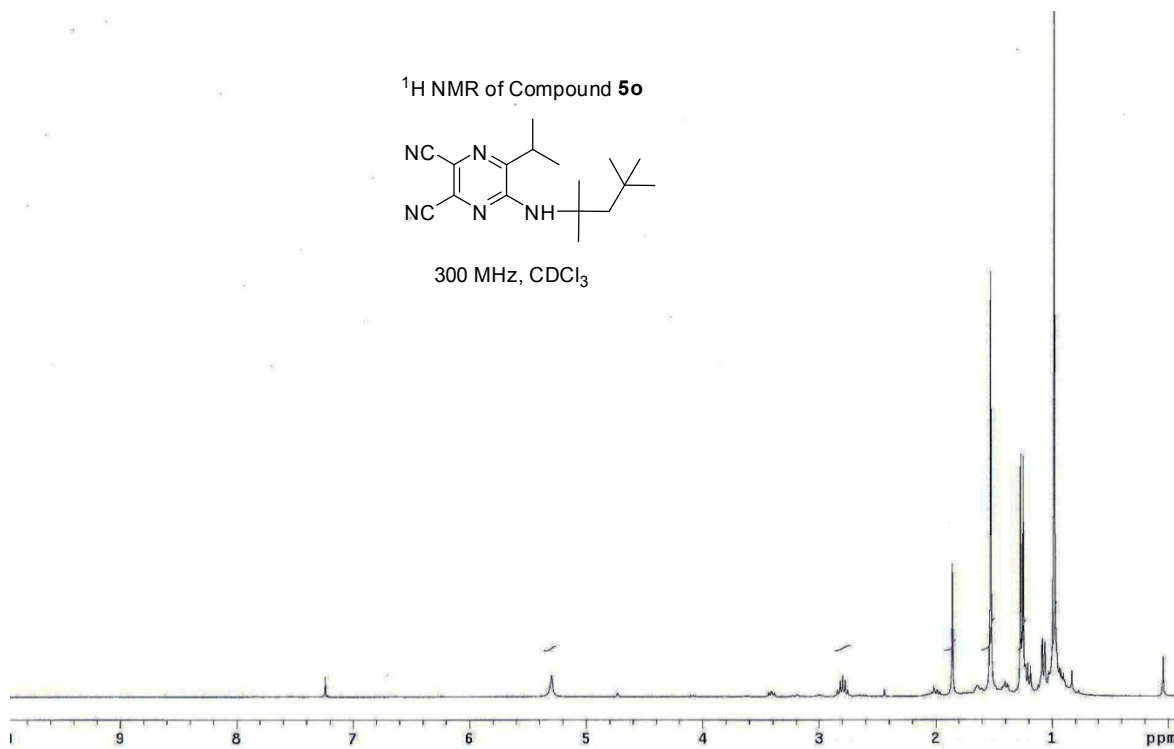

<sup>13</sup>C NMR of Compound **5o**

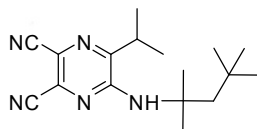

75 MHz, CDCl<sub>3</sub>

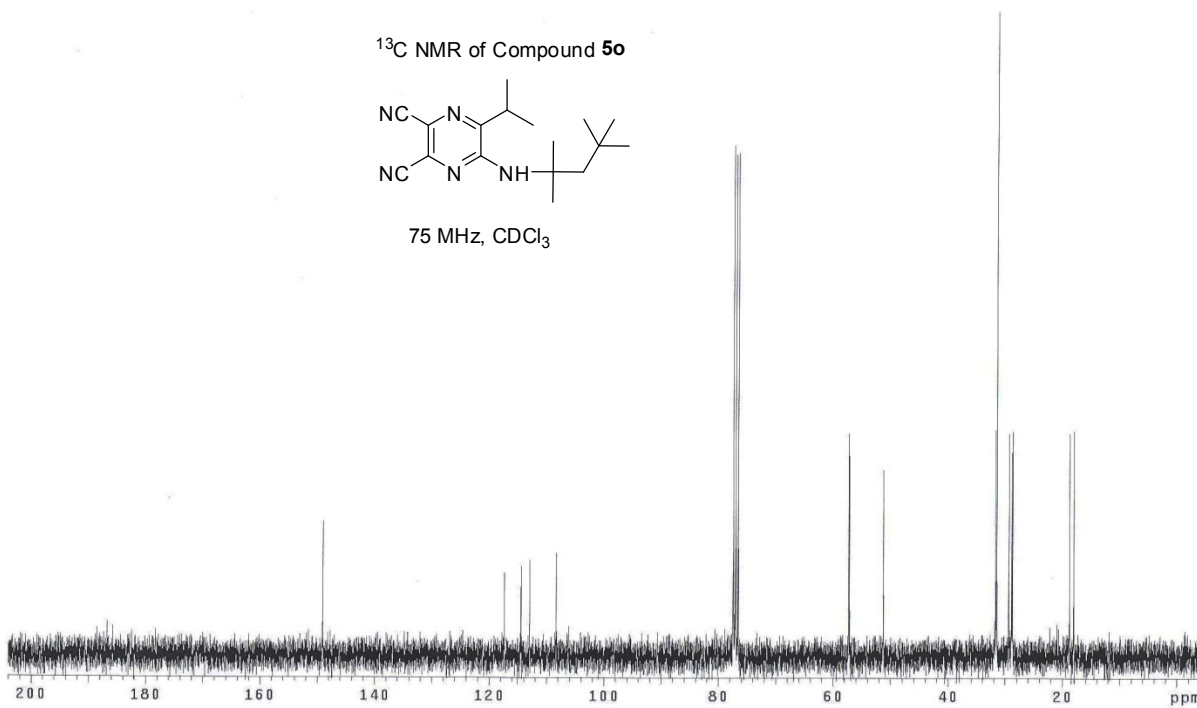



<sup>1</sup>H NMR of Compound **5p**

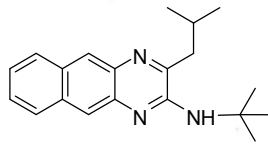

300 MHz, CDCl<sub>3</sub>

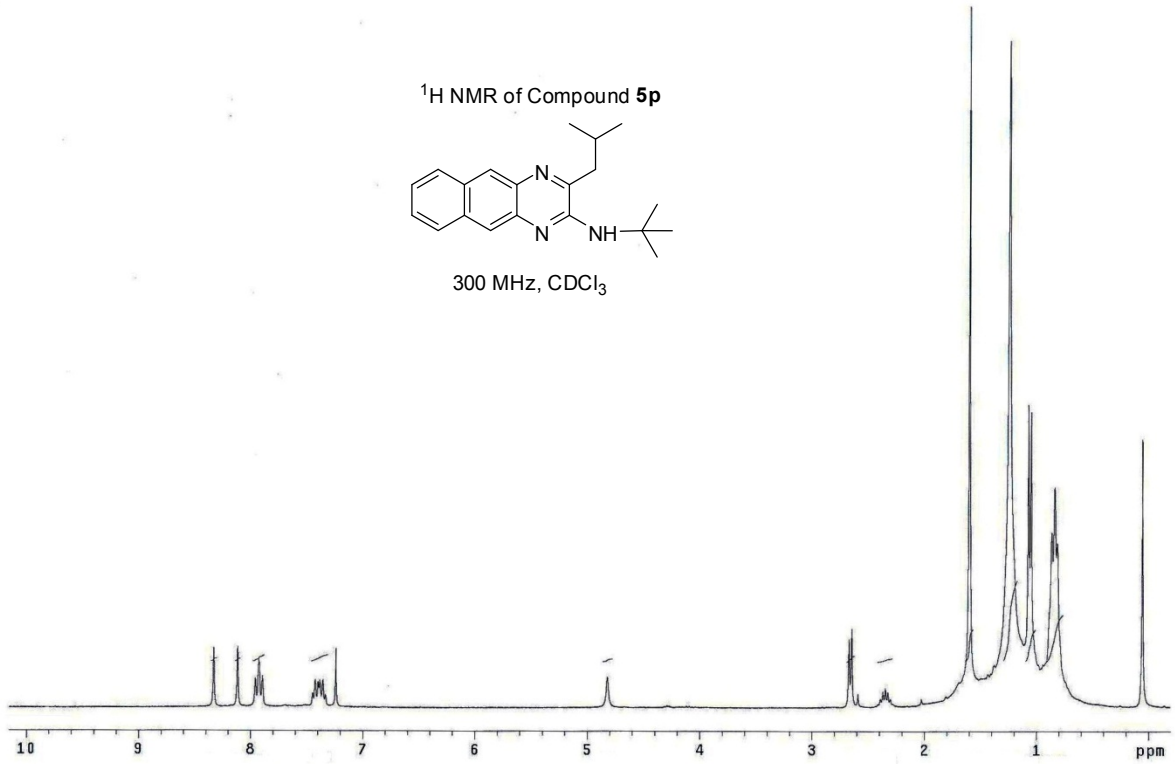

<sup>13</sup>C NMR of Compound **5p**

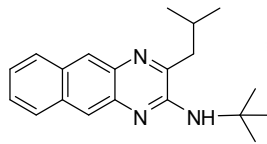

75 MHz, CDCl<sub>3</sub>

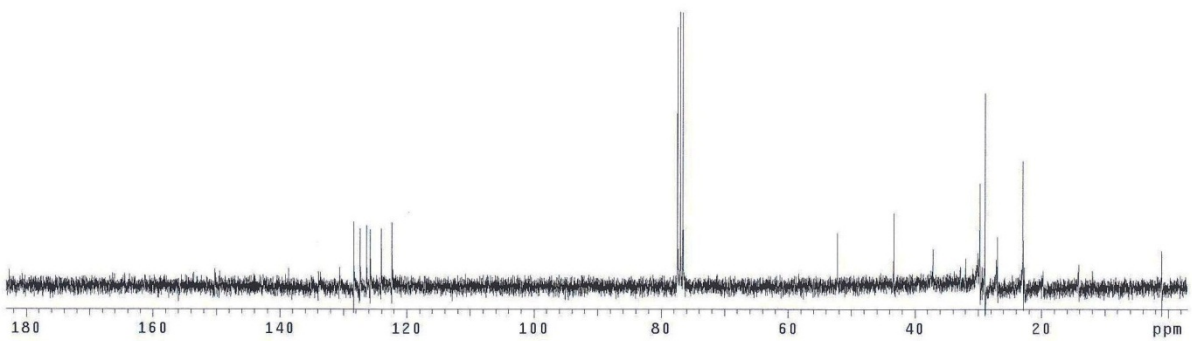

<sup>1</sup>H NMR of Compound **5q**

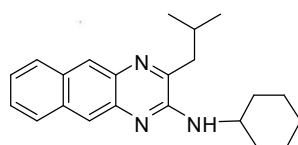

300 MHz, CDCl<sub>3</sub>

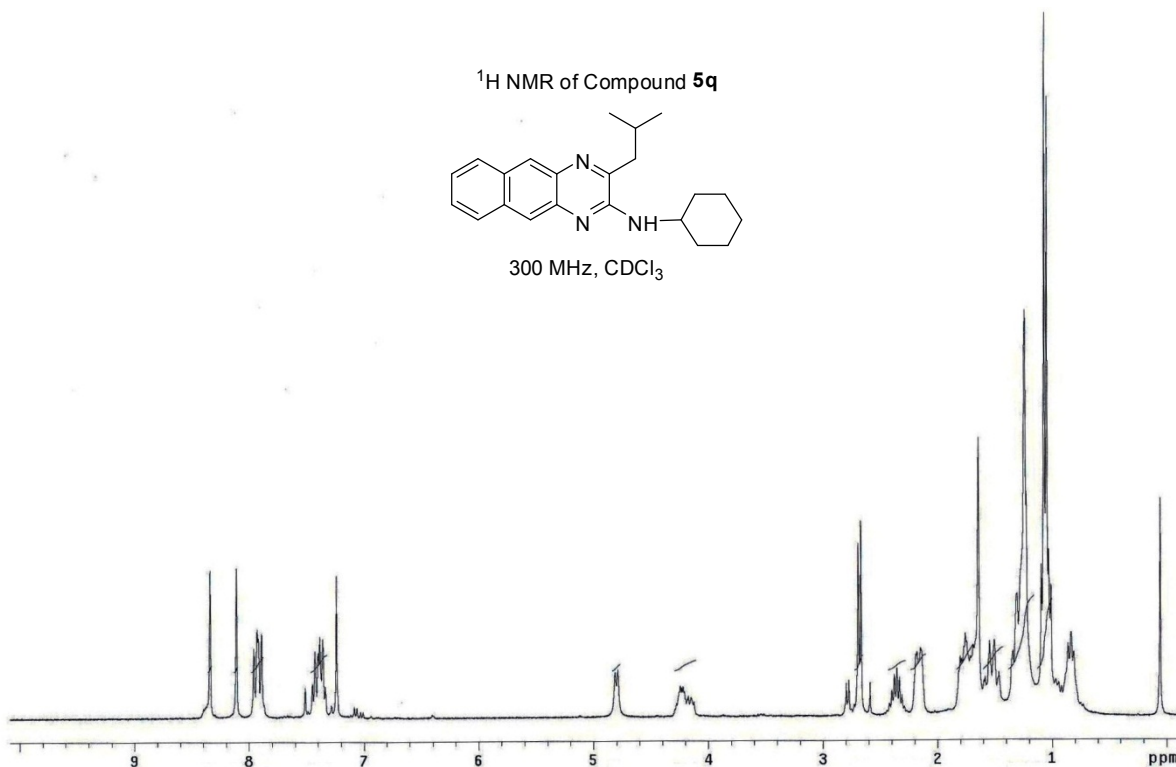

<sup>13</sup>C NMR of Compound **5q**

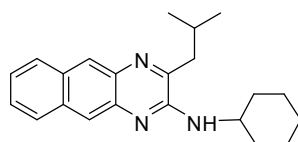

75 MHz, CDCl<sub>3</sub>

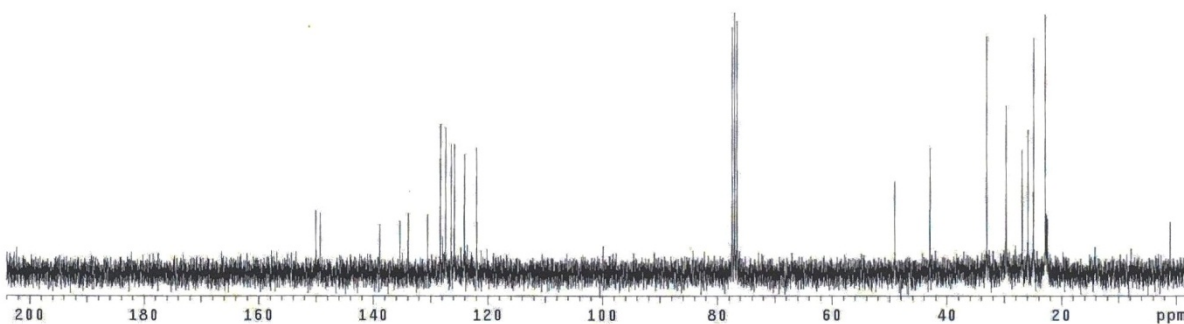

### III. $^1\text{H}$ NMR and $^{13}\text{C}$ NMR spectra of compounds (7a-7i)

$^1\text{H}$  NMR of Compound 7a

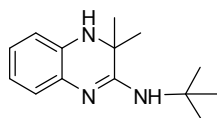

300 MHz,  $\text{CDCl}_3$

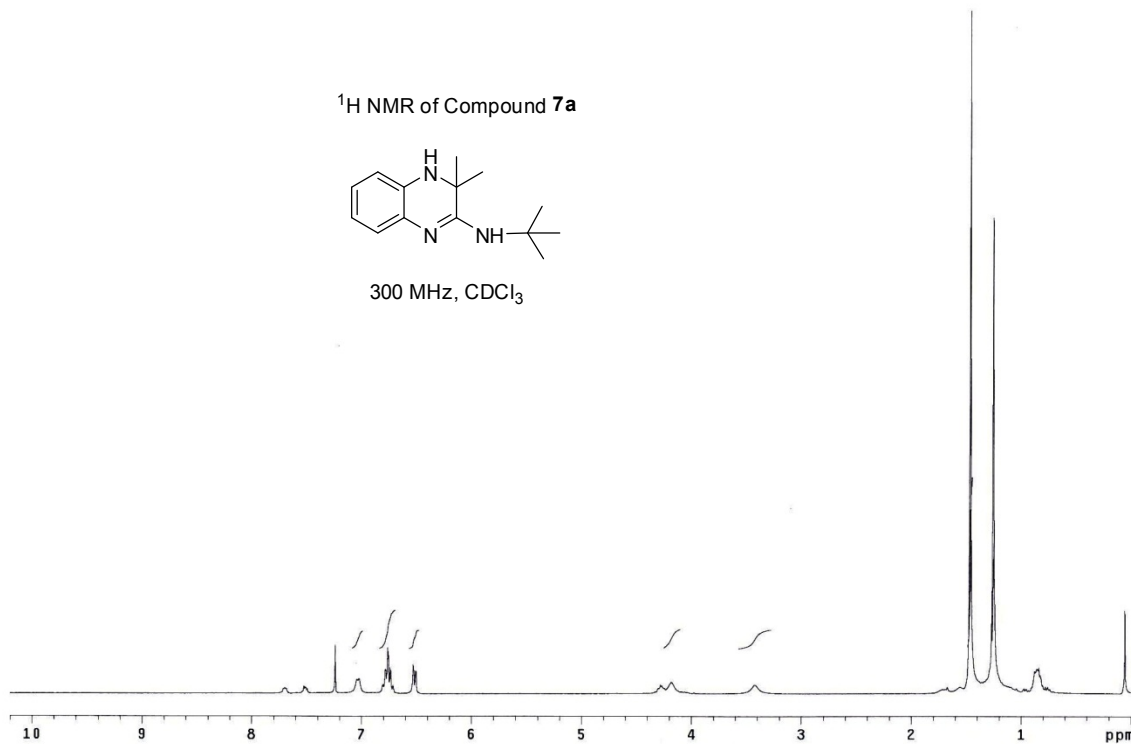

$^{13}\text{C}$  NMR of Compound 7a

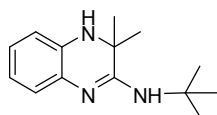

75 MHz,  $\text{CDCl}_3$

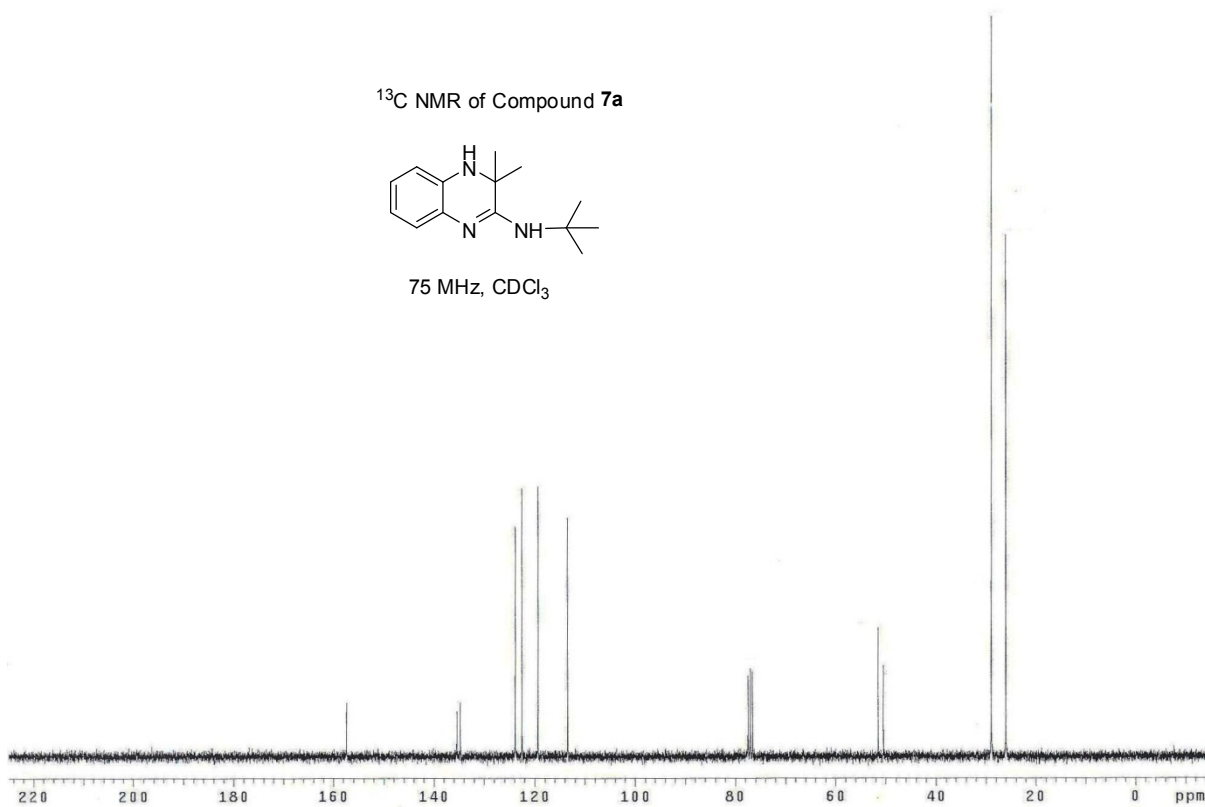

<sup>1</sup>H NMR of Compound **7b**

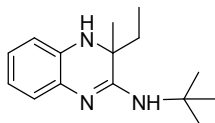

300 MHz, CDCl<sub>3</sub>

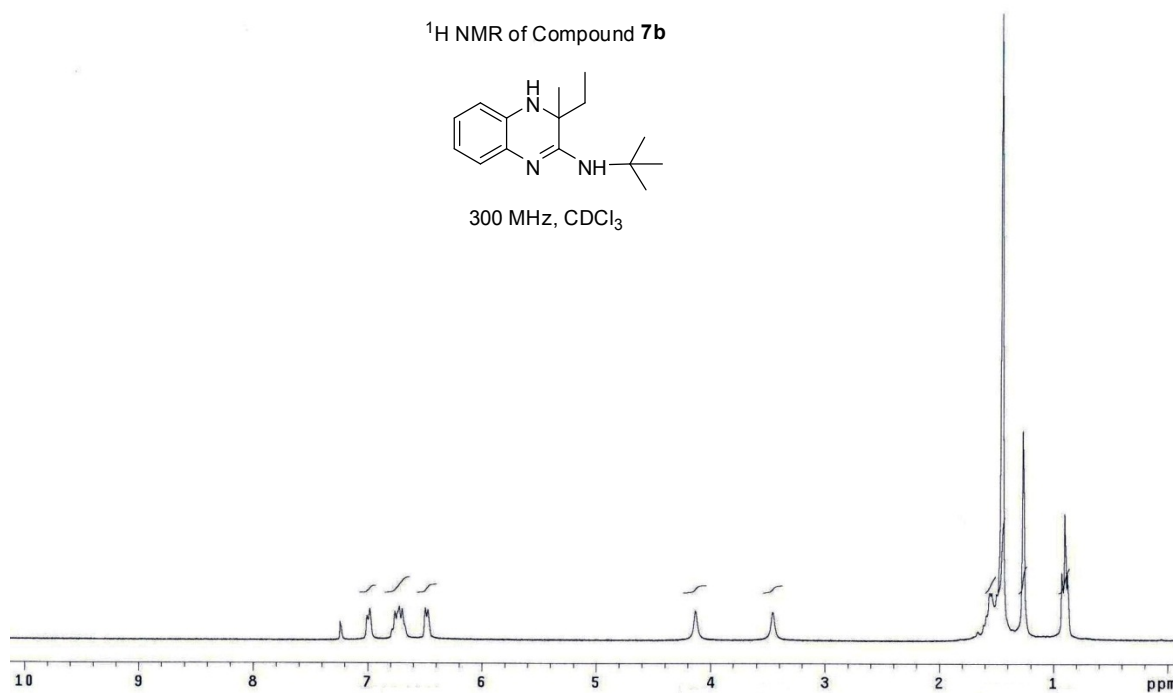

<sup>13</sup>C NMR of Compound **7b**

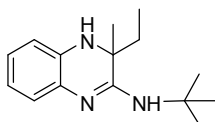

75 MHz, CDCl<sub>3</sub>

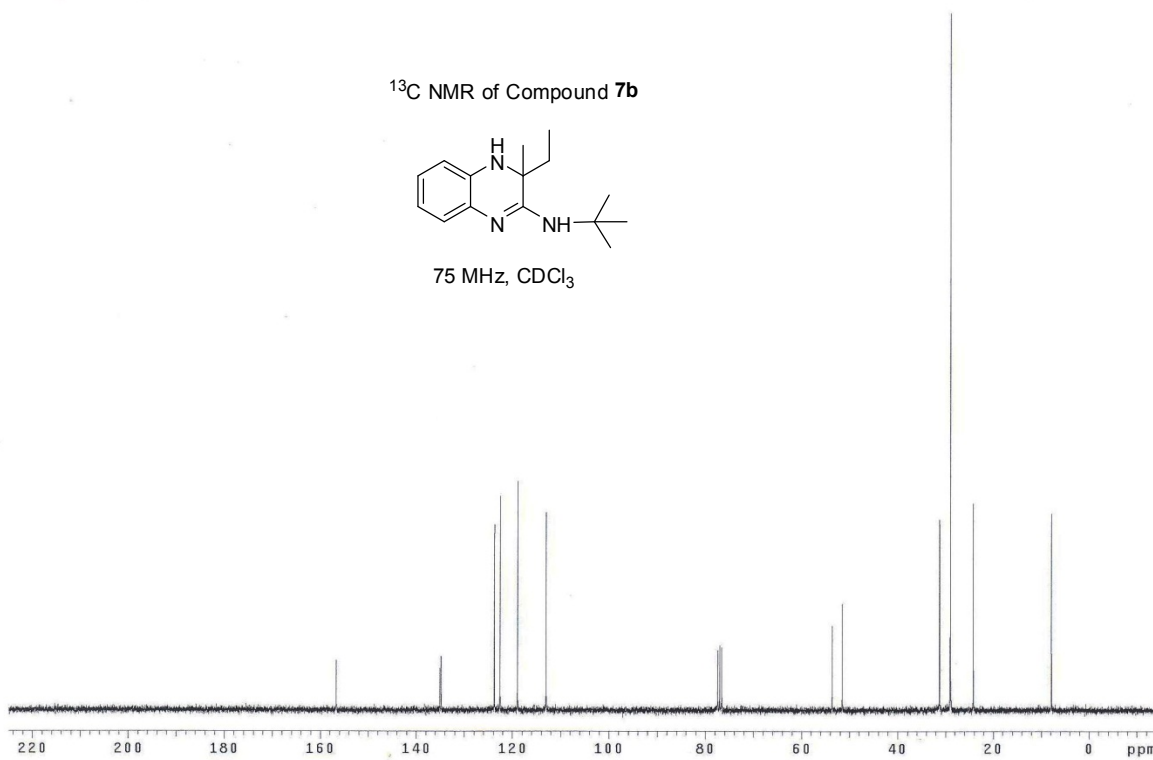

<sup>1</sup>H NMR of Compound 7c

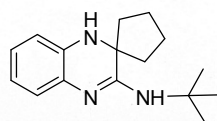

300 MHz, CDCl<sub>3</sub>

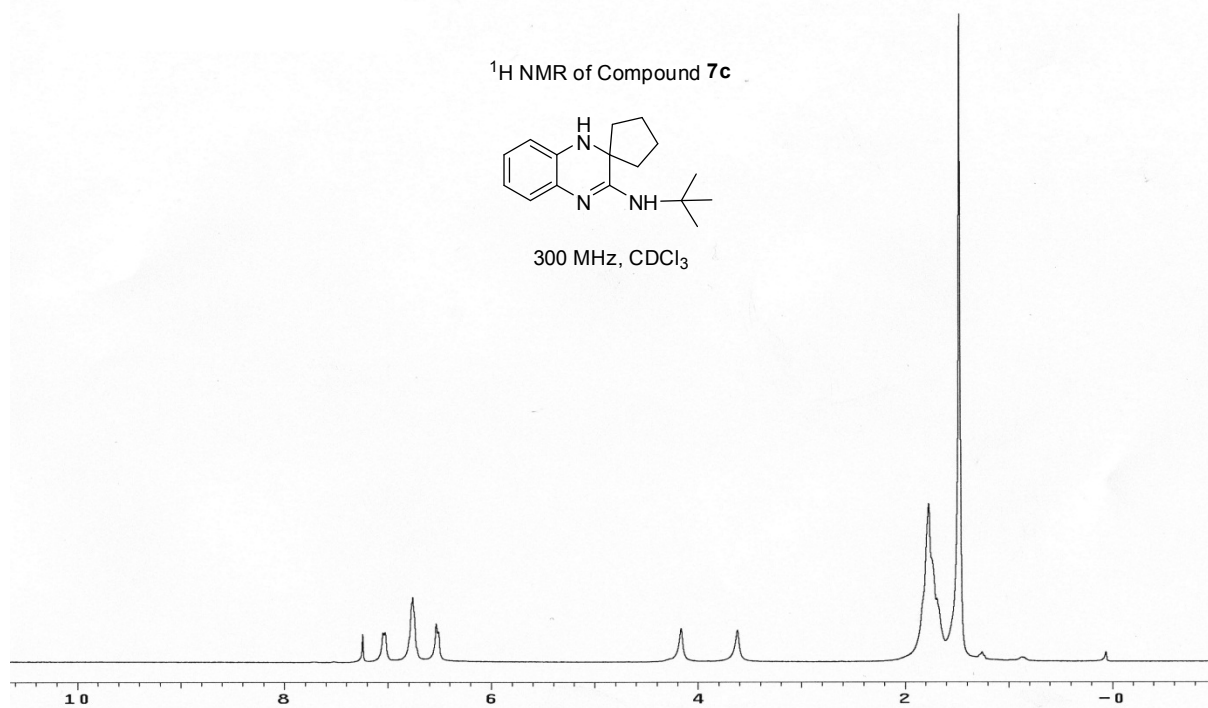

<sup>13</sup>C NMR of Compound 7c

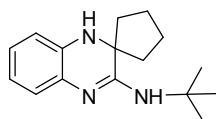

75 MHz, CDCl<sub>3</sub>

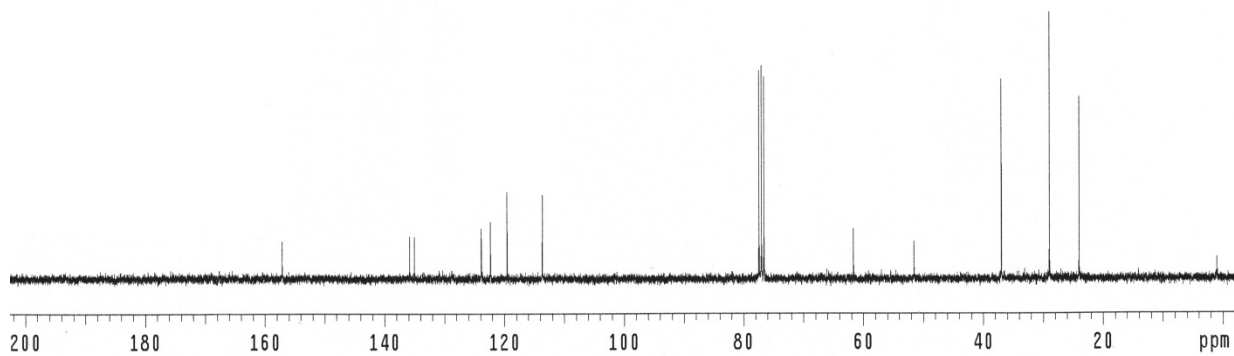

<sup>1</sup>H NMR of Compound 7d

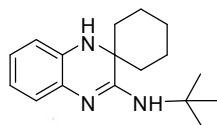

300 MHz, CDCl<sub>3</sub>

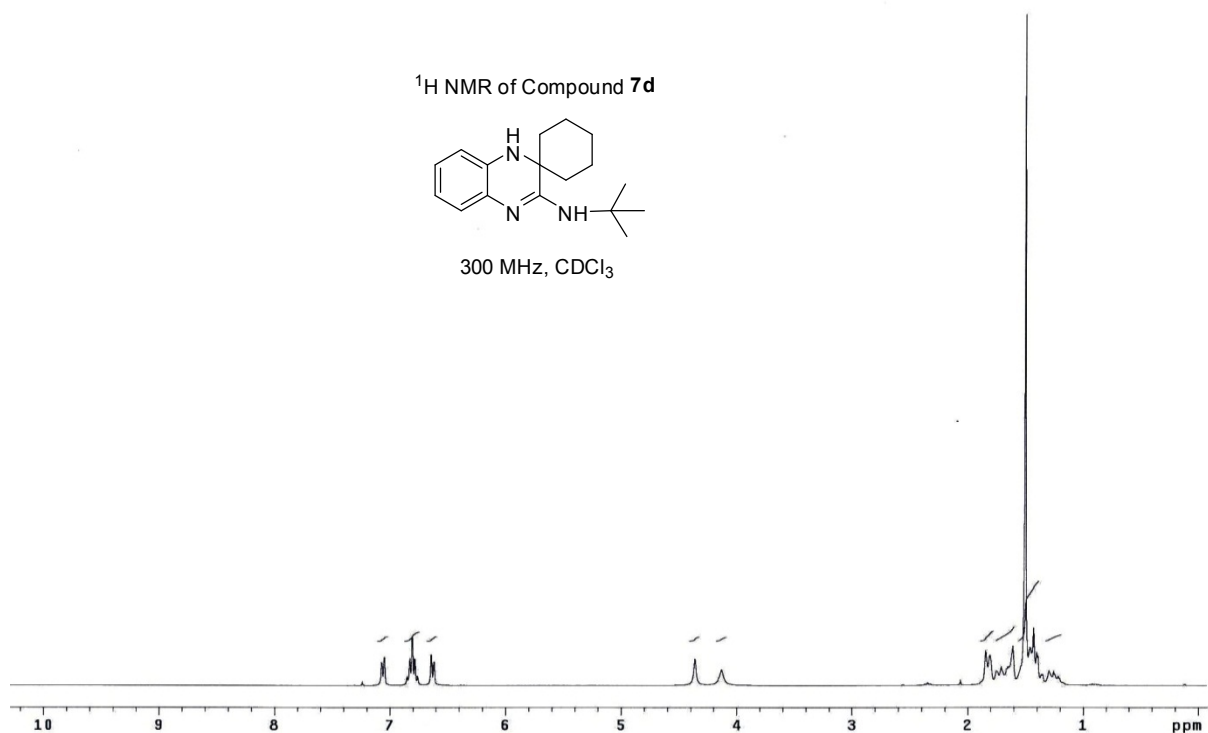

<sup>13</sup>C NMR of Compound 7d

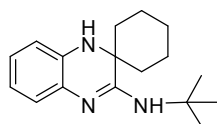

75 MHz, CDCl<sub>3</sub>

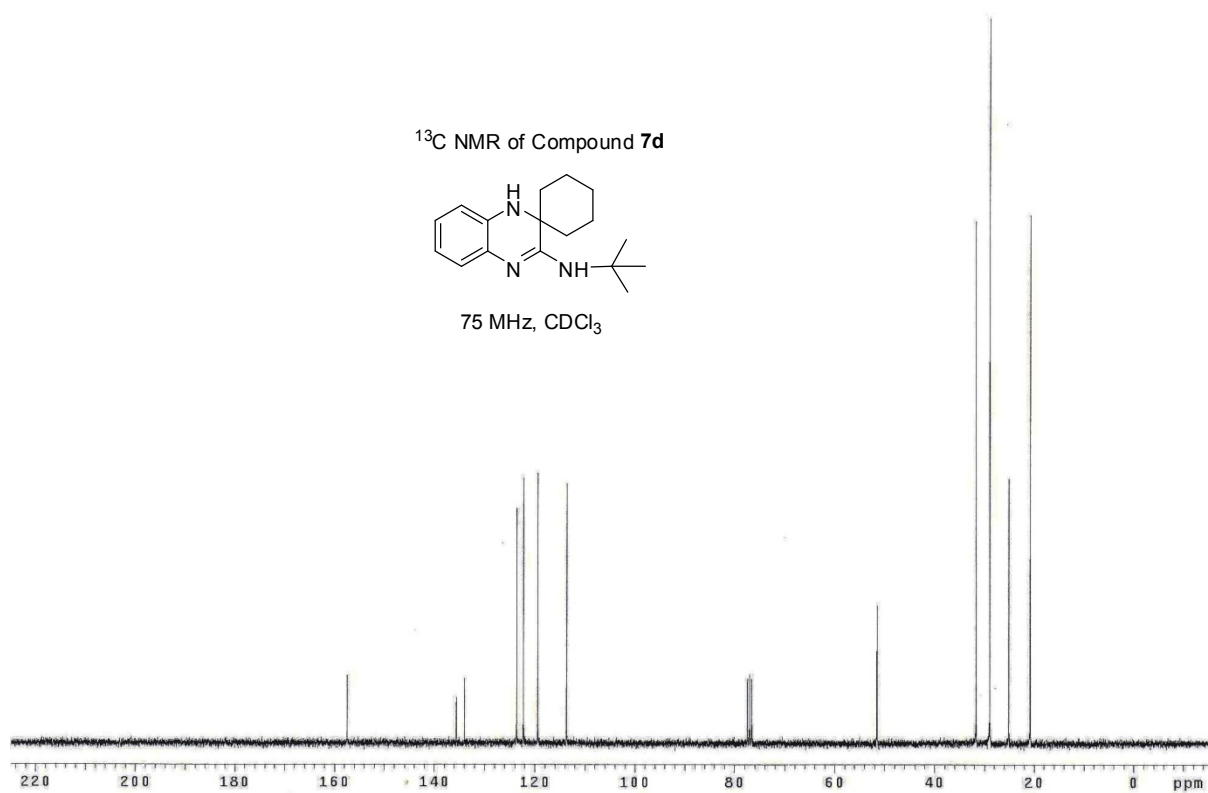

<sup>1</sup>H NMR of Compound 7e

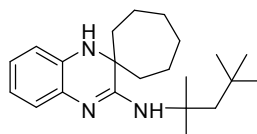

300 MHz, CDCl<sub>3</sub>

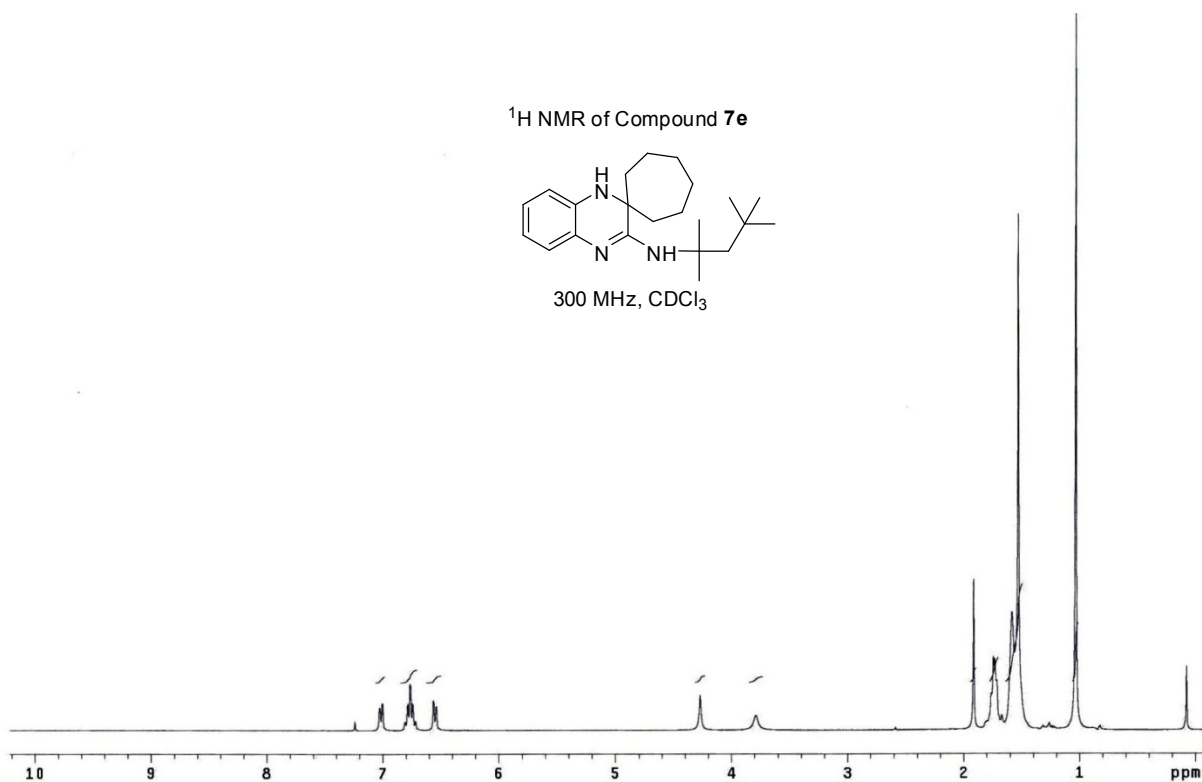

<sup>13</sup>C NMR of Compound 7e

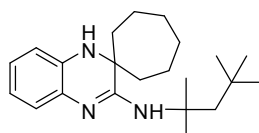

75 MHz, CDCl<sub>3</sub>

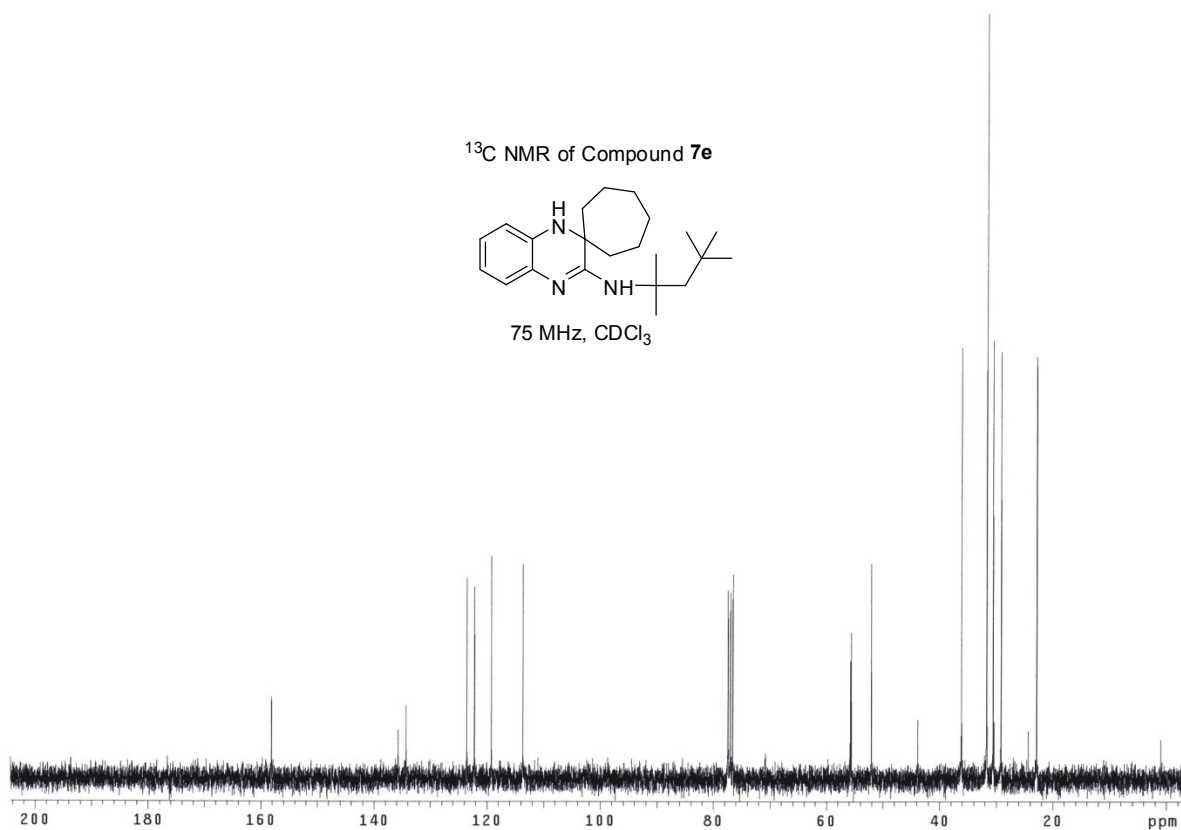

<sup>1</sup>H NMR of Compound **7f**

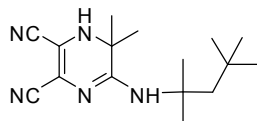

300 MHz, CDCl<sub>3</sub>

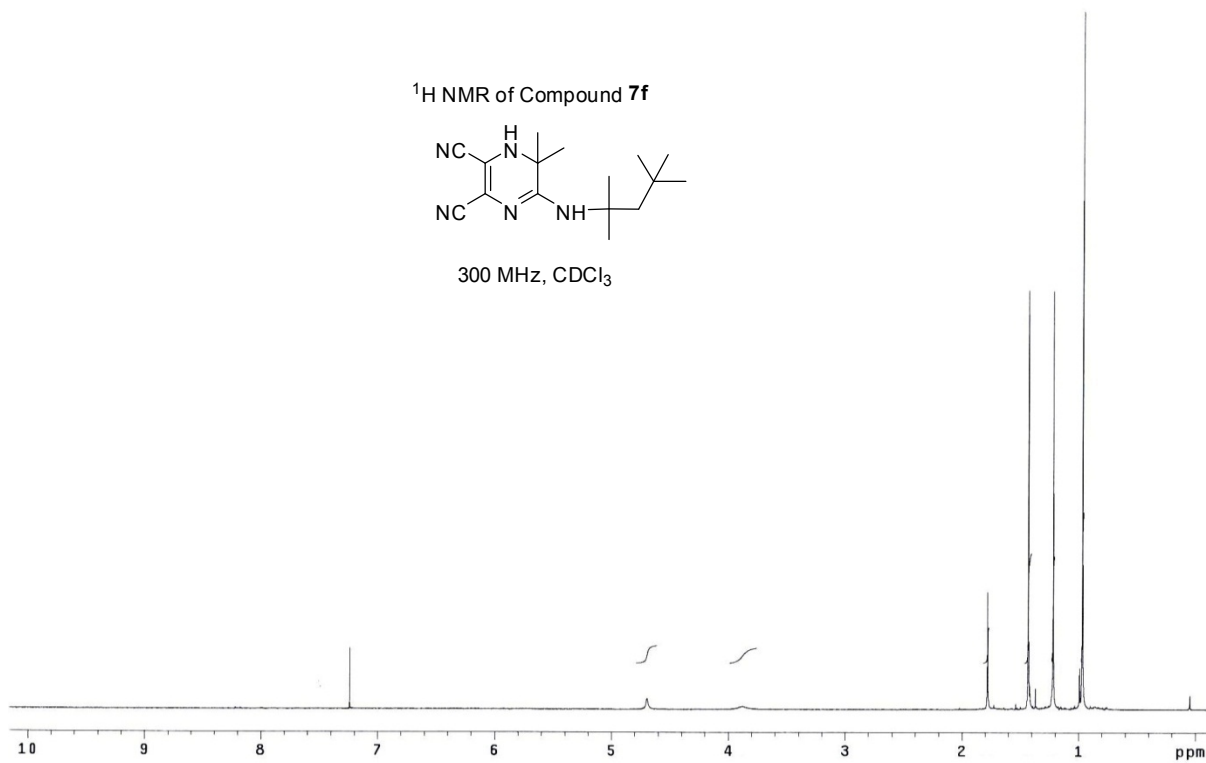

<sup>13</sup>C NMR of Compound **7f**

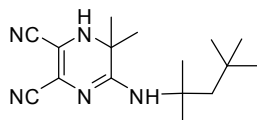

75 MHz, CDCl<sub>3</sub>

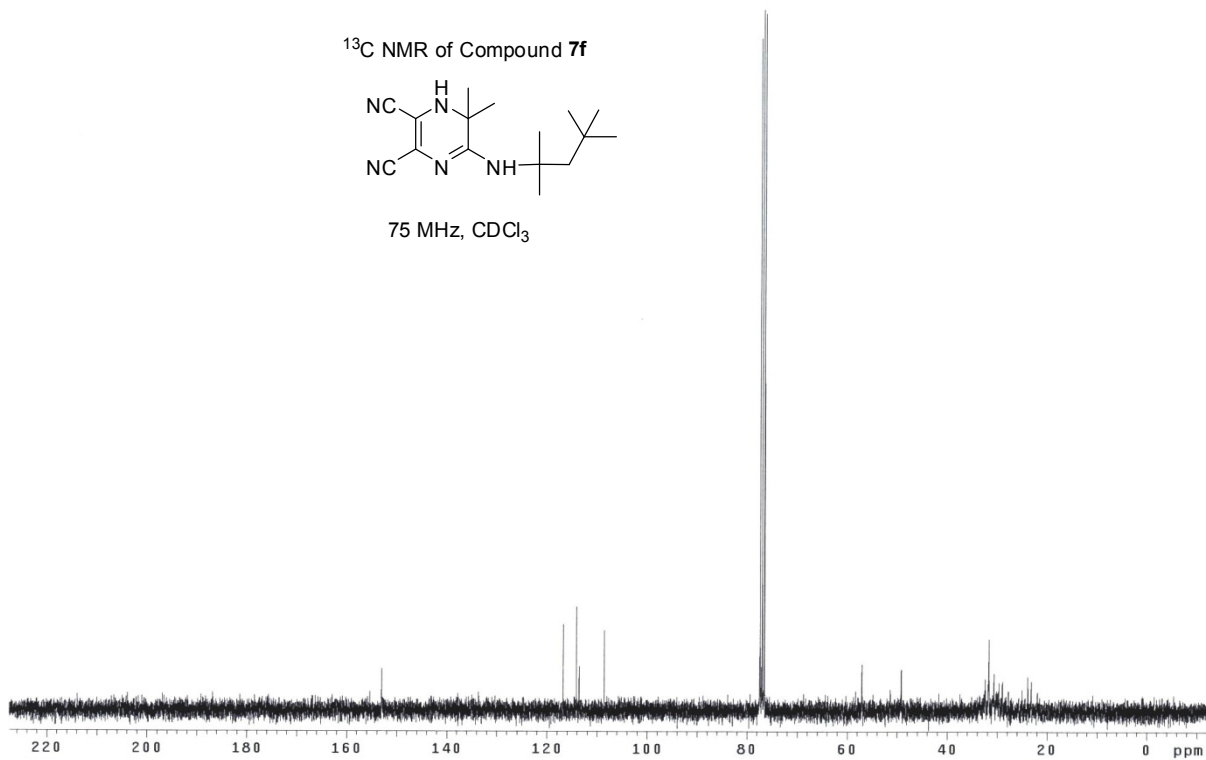



<sup>1</sup>H NMR of Compound 7g

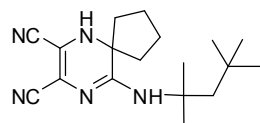

300 MHz, CDCl<sub>3</sub>

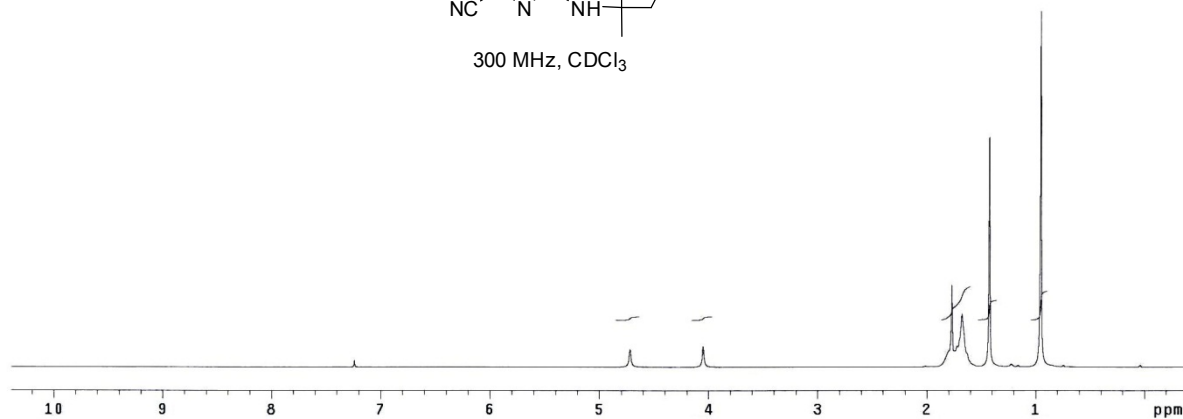

<sup>13</sup>C NMR of Compound 7g

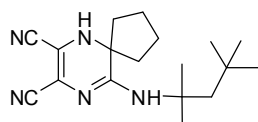

75 MHz, CDCl<sub>3</sub>

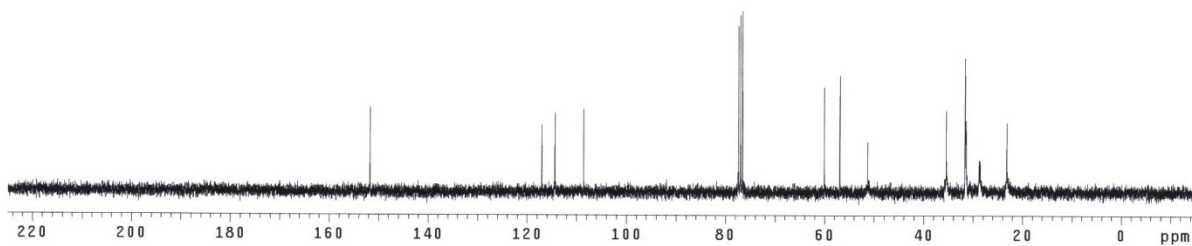

<sup>1</sup>H NMR of Compound 7h

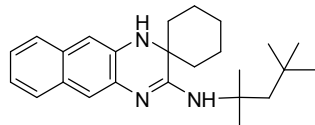

300 MHz, CDCl<sub>3</sub>

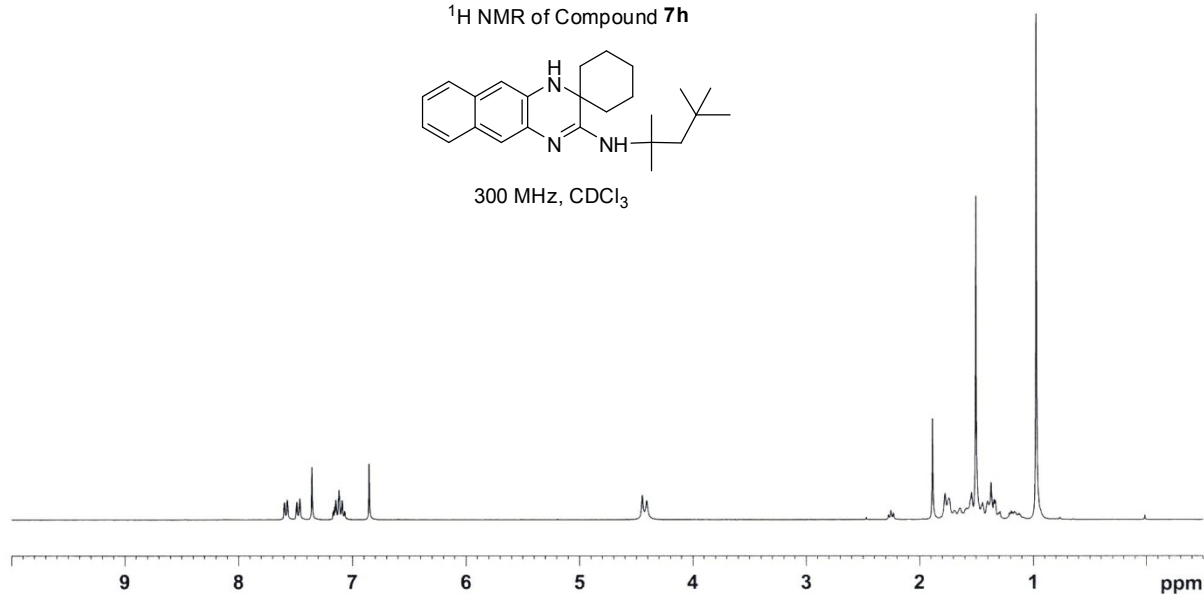

<sup>13</sup>C NMR of Compound 7h

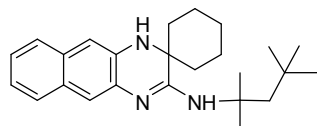

75 MHz, CDCl<sub>3</sub>

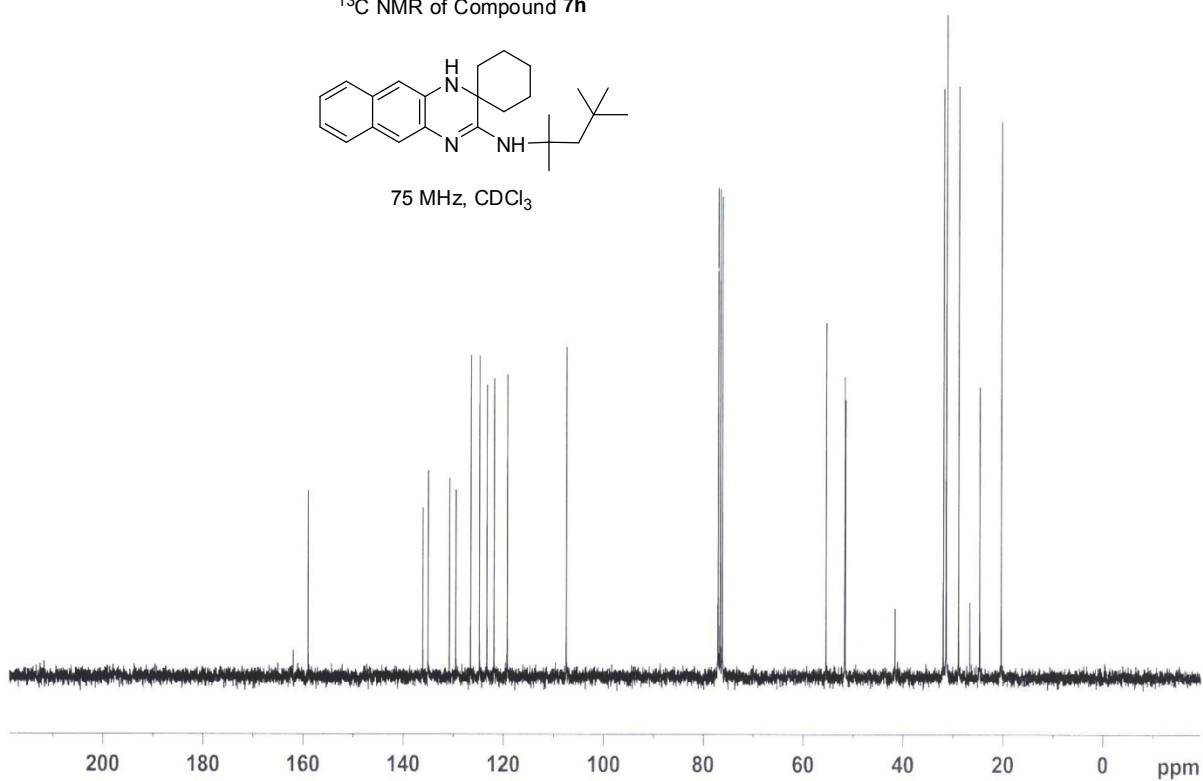

<sup>1</sup>H NMR of Compound 7i

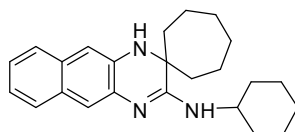

300 MHz, CDCl<sub>3</sub>

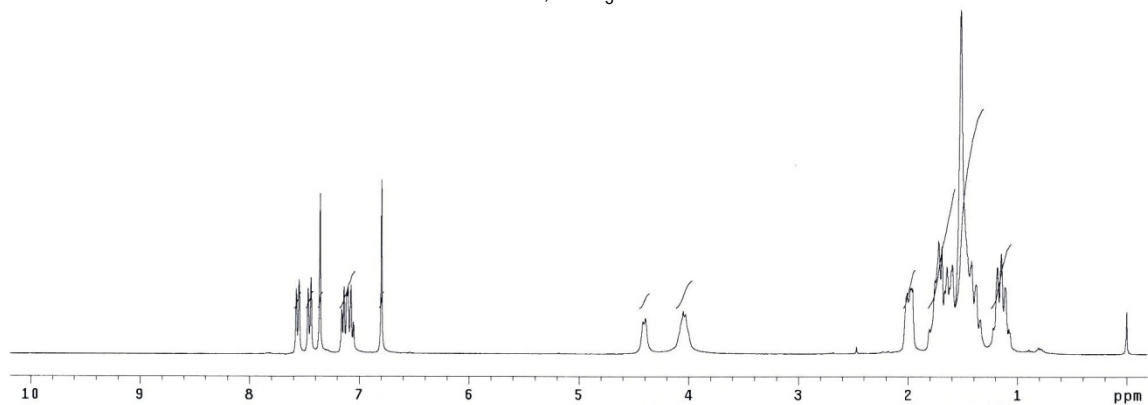

<sup>13</sup>C NMR of Compound 7i

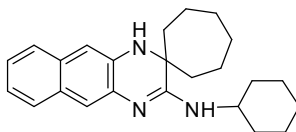

75 MHz, CDCl<sub>3</sub>

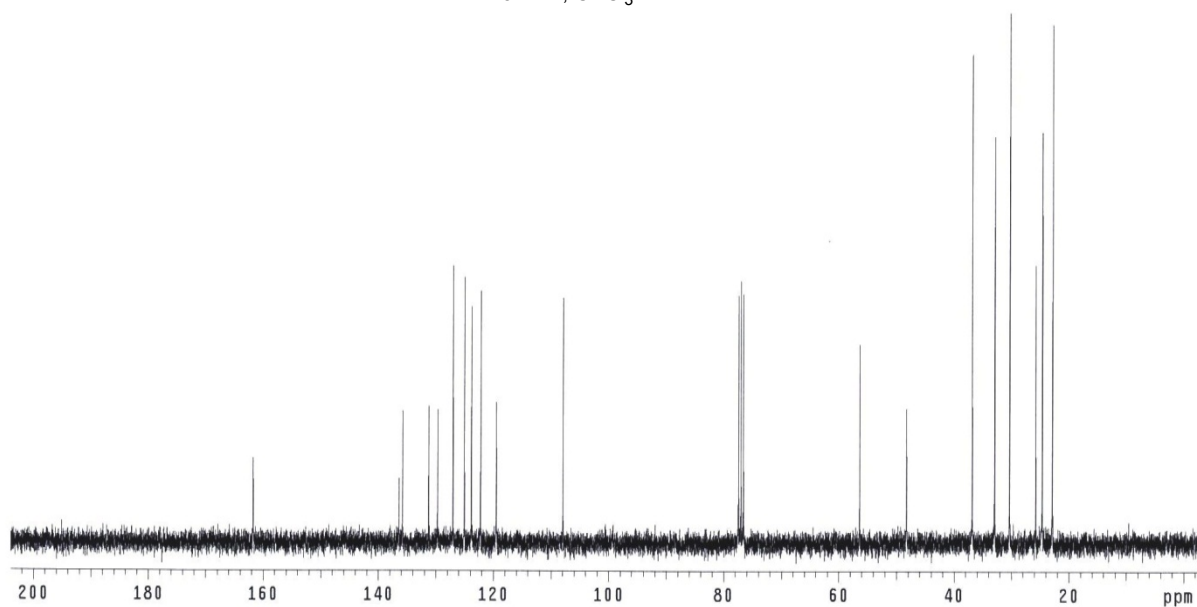

#### IV. $^1\text{H}$ NMR and $^{13}\text{C}$ NMR spectra of compounds (14a & 14b)

$^1\text{H}$  NMR of Compound 14a

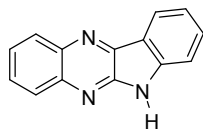

300 MHz, DMSO

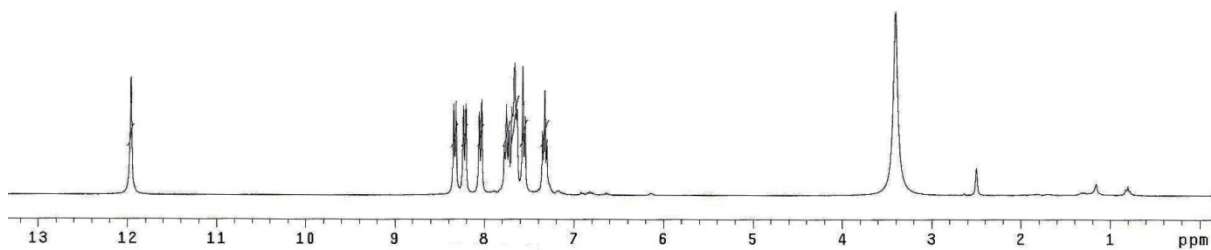

$^{13}\text{C}$  NMR of Compound 14a

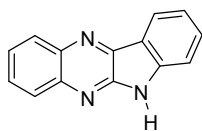

75 MHz, DMSO

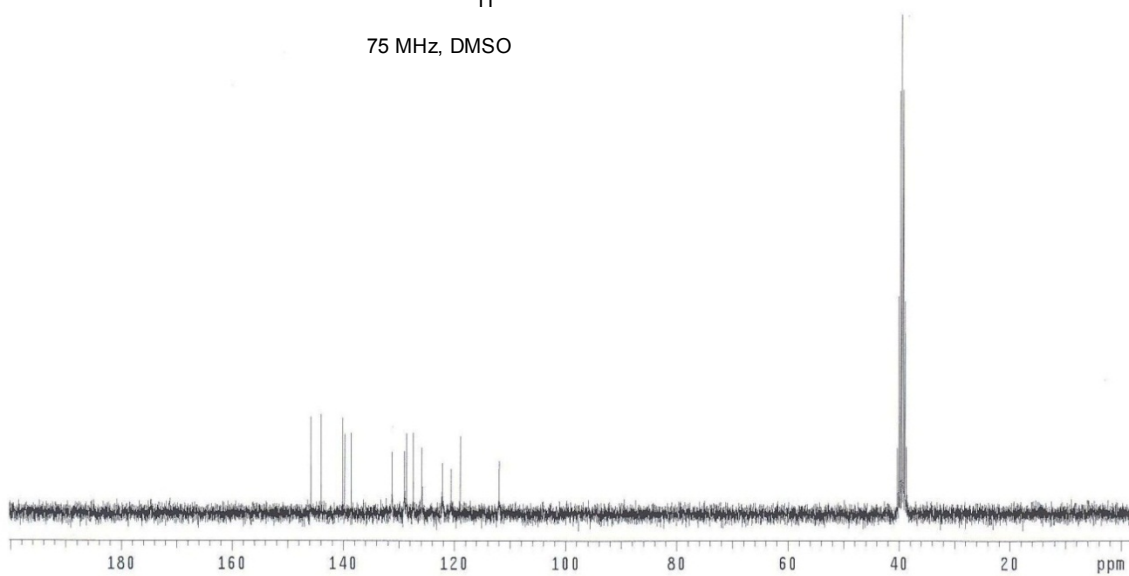

<sup>1</sup>H NMR of Compound **14b**

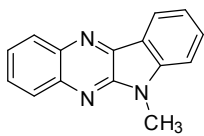

300 MHz, CDCl<sub>3</sub>

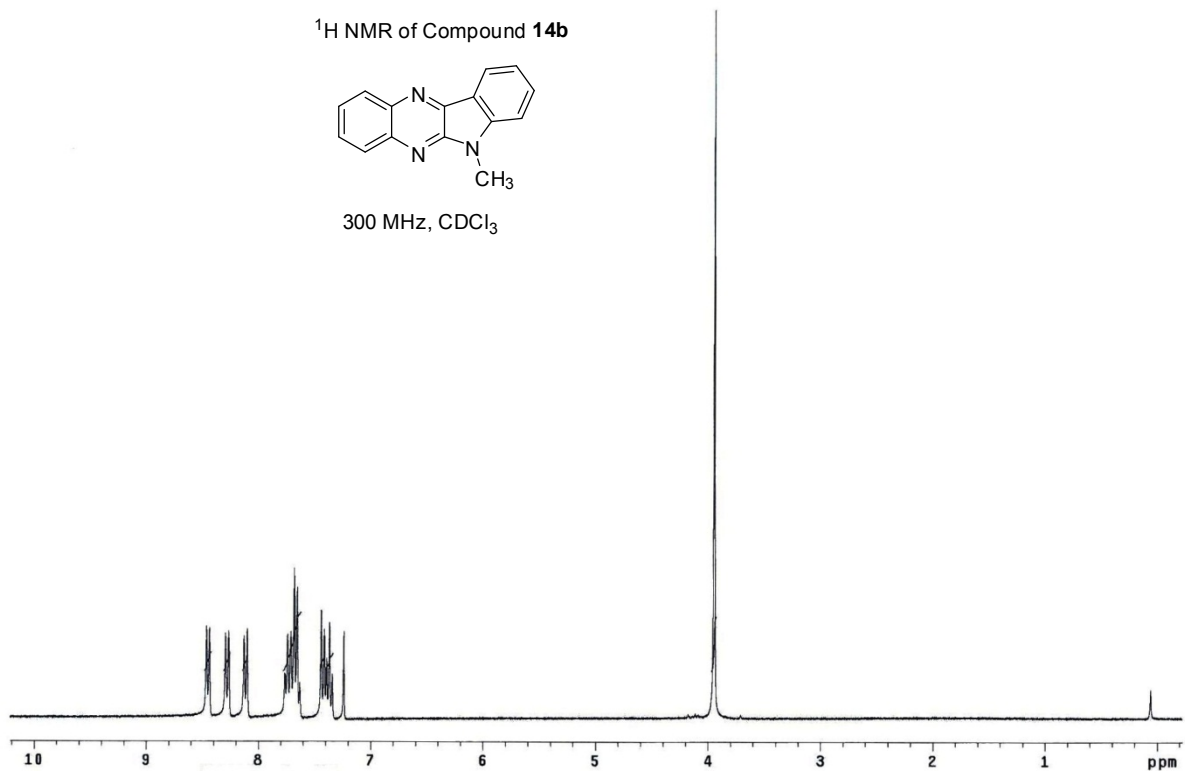

<sup>13</sup>C NMR of Compound **14b**

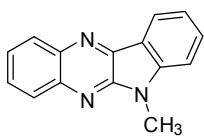

75 MHz, CDCl<sub>3</sub>

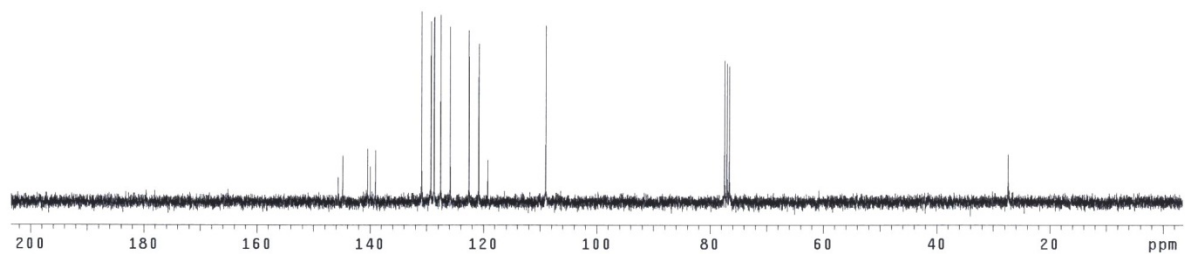

Supplement: c4ra00717d1.pdf [file c4ra00717d1.pdf]
